# Supplementary material for: I2-Promoted formal [3+2] cycloaddition of α-methylenyl isocyanides with methyl ketones: a route to 2,5-disubstituted oxazoles
Source: Royal Society of Chemistry journal article supplement (doi:10.1039/c6cc10275a), 2017-01-01

## Supporting Information

### I<sub>2</sub>-Promoted formal [3+2] cycloaddition of $\alpha$ -methylene isocyanides with methyl ketones: a route to 2,5-disubstituted oxazoles

Xia Wu, Xiao Geng, Peng Zhao, Jingjing Zhang, Yan-dong Wu,\* and An-xin Wu\*

Key Laboratory of Pesticide & Chemical Biology, Ministry of Education, College of Chemistry, Central China Normal University, Wuhan 430079, P. R. China

E-mail: chwuyd@mail.ccnu.edu.cn, chwuax@mail.ccnu.edu.cn.

| <b>Table of Contents</b>                                                                 | <b>page</b> |
|------------------------------------------------------------------------------------------|-------------|
| 1. General.....                                                                          | S2          |
| 2. General procedure for the synthesis of <b>3</b> .....                                 | S2          |
| 3. Optimization of the Reaction Conditions.....                                          | S2          |
| 4. Mass spectrum of <b>3aa'</b> and <sup>1</sup> H NMR of <b>3aa-d<sub>1</sub></b> ..... | S2-S4       |
| 5. <sup>13</sup> C NMR spectroscopy monitored.....                                       | S4-S5       |
| 6. Control Experiments.....                                                              | S5-S6       |
| 7. Characterization data for compounds <b>3</b> .....                                    | S6-S12      |
| 8. Crystallographic data and molecular structure of <b>3ga</b> .....                     | S12-S13     |
| 9. References.....                                                                       | S13         |
| 10. <sup>1</sup> H and <sup>13</sup> C NMR spectra of compounds <b>3</b> .....           | S12-S36     |

## 1. General

All substrates and reagents were commercially available and used without further purification. TLC analysis was performed using pre-coated glass plates. Column chromatography was performed using silica gel (200–300 mesh). IR spectra were recorded on a Perkin-Elmer PE-983 infrared spectrometer as KBr pellets with absorption in  $\text{cm}^{-1}$ .  $^1\text{H}$  spectra were recorded in  $\text{CDCl}_3$  on 300/600 MHz NMR spectrometers and resonances ( $\delta$ ) are given in parts per million relative to tetramethylsilane. Data are reported as follows: chemical shift, multiplicity (s = singlet, d = doublet, t = triplet, m = multiplet), coupling constants (Hz) and integration.  $^{13}\text{C}$  spectra were recorded in  $\text{CDCl}_3$  on 75/100/150 MHz NMR spectrometers and resonances ( $\delta$ ) are given in ppm. HRMS were obtained on a Bruker 7-tesla FT-ICR MS equipped with an electrospray source. The X-ray crystal-structure determinations of **3ga** were obtained on a Bruker SMART APEX CCD system. Melting points were determined using XT-4 apparatus and not corrected.

## 2. General procedure for the synthesis of 3 (3aa as an example)

To a solution of acetophenone **1a** (1.0 mmol) and iodine (1.6 mmol) in DMSO (3 mL) was added ethyl 2-isocyanoacetate **2a** (2.0 mmol). Then the mixture was stirred at 130 °C till almost completed conversion of the substrates by TLC analysis. the mixture was quenched with water (50 mL), extracted with EtOAc (3 × 50 mL). The combined organic layers were washed with brine, dried over anhydrous  $\text{Na}_2\text{SO}_4$  and concentrated under reduced pressure. The crude product was purified by column chromatography on silica gel (eluent: petroleum ether/EtOAc) to afford the product **3aa**.

## 3. Optimization of the Reaction Conditions<sup>a</sup>

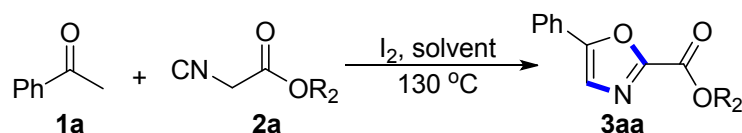

| Entry          | Solvent | yield (%) <sup>b</sup> |
|----------------|---------|------------------------|
| 1              | DMF     | 0                      |
| 2              | toluene | 0                      |
| 3 <sup>c</sup> | DMSO    | 0                      |

<sup>a</sup>Reaction conditions: **1a** (1.0 mmol), **2a** and  $\text{I}_2$  were heated in 3 mL of DMSO. <sup>b</sup>Isolated yield.

<sup>c</sup> $\text{Ag}_2\text{O}$  was used instead of  $\text{I}_2$ .

A brief screening of the reaction media proved that DMSO was the best choice with respect to yields. Moreover, molecular iodine was the best medium.

## 4. Mass spectrum of 3aa' and $^1\text{H}$ NMR of 3aa-*d*<sub>1</sub>

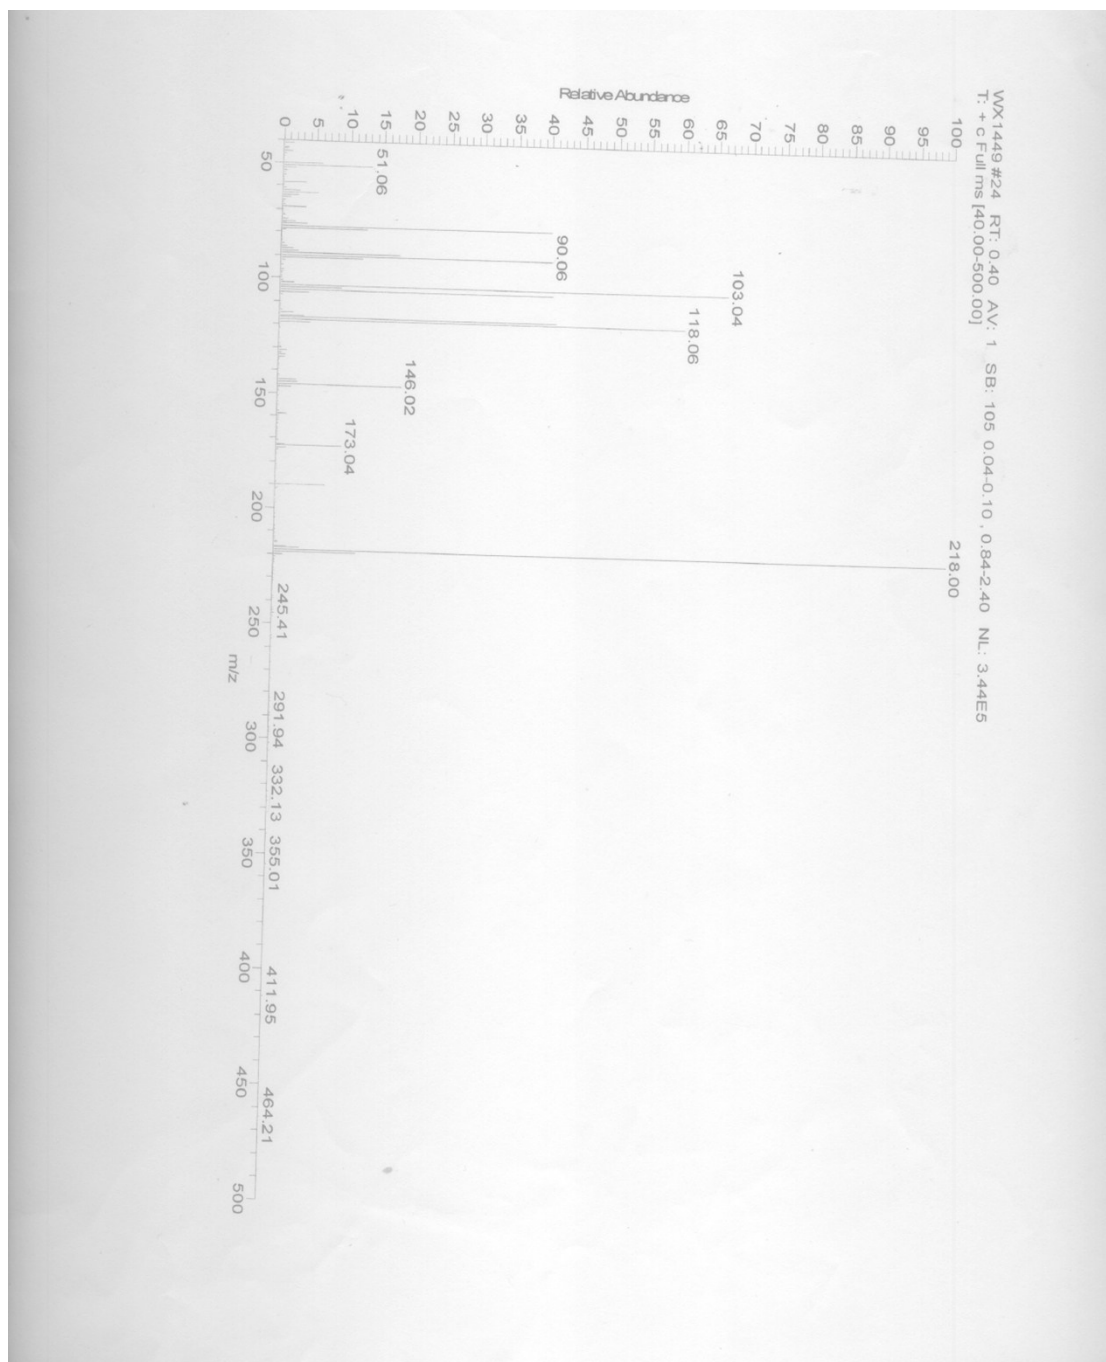

The molecular weight of **3aa'** detected by MS. MS (EI): m/z 219.19 (M-1, 3.71%), 218.00 (M, 100%), 219.06 (M+1, 12.03%). This result indicated that methyl ketones provided two carbons of the oxazoles ring.

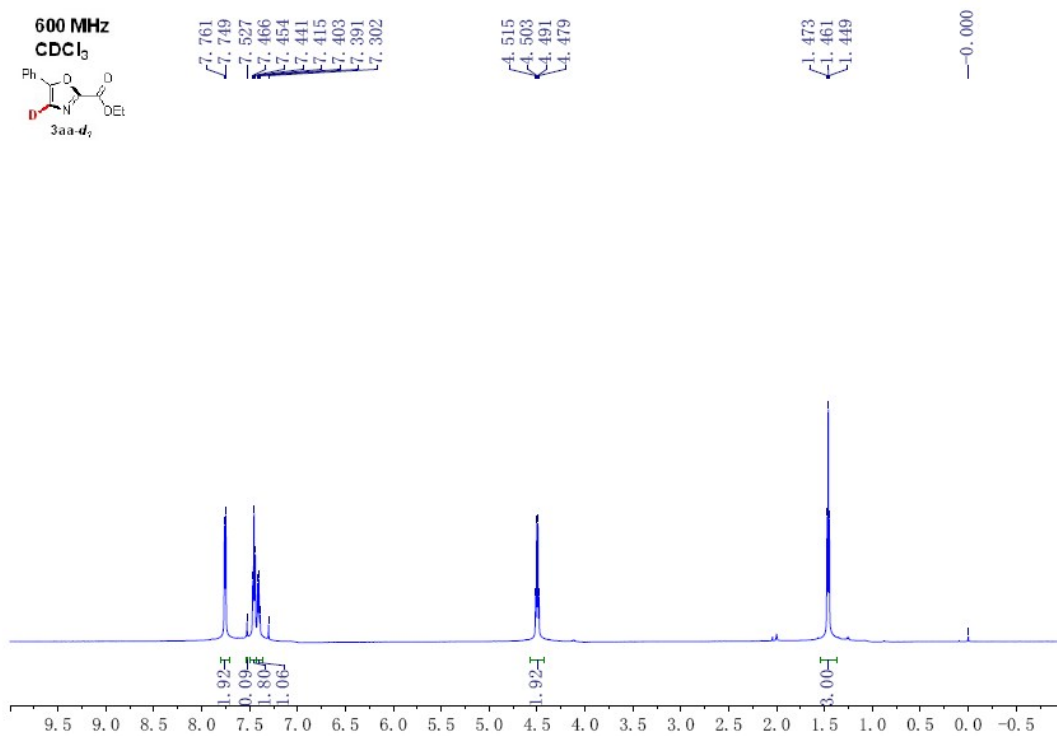

### 5. <sup>13</sup>C NMR spectroscopy monitored

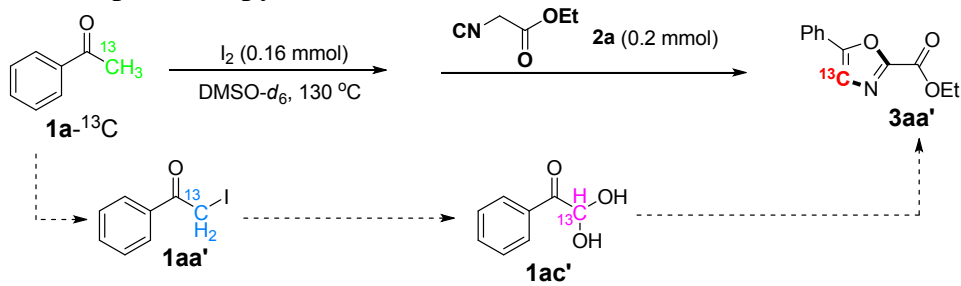

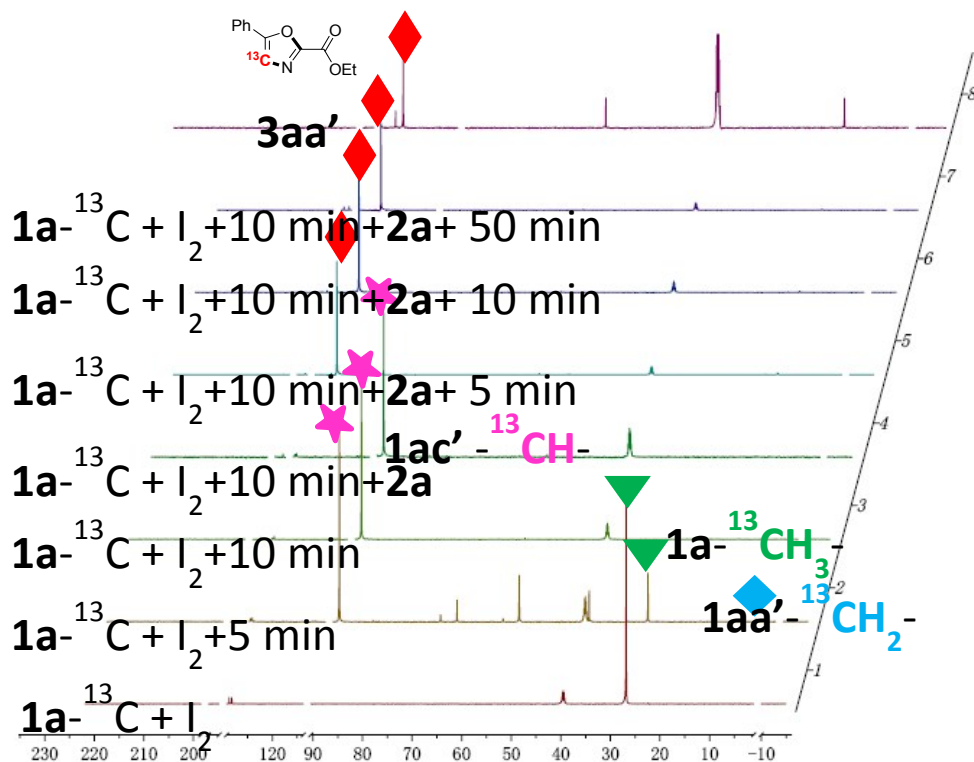

Figure 1. Progress of the reaction of **1a** (0.1 mmol), **2a** (0.2 mmol) with  $I_2$  (0.16 mmol) at 130 °C by  $^{13}C$  NMR (150 MHz,  $DMSO-d_6$ , 298 ± 0.5 K)

The reaction of **1a**- $^{13}C$  (0.1 mmol) with **2a** (0.2 mmol) in the presence of  $I_2$  (0.16 mmol) in  $DMSO-d_6$  was monitored by  $^{13}C$  NMR spectroscopy to develop a deeper understanding of the reaction mechanism (Figure 1).<sup>1</sup> The results of this study also revealed that phenacyl iodine (**1aa'**) and phenylglyoxal (**1ac'**) were important intermediates in the overall transformation. Moreover, this experimental result also indicated that methyl ketones provided two carbons of the oxazoles ring.

## 6. Control Experiments

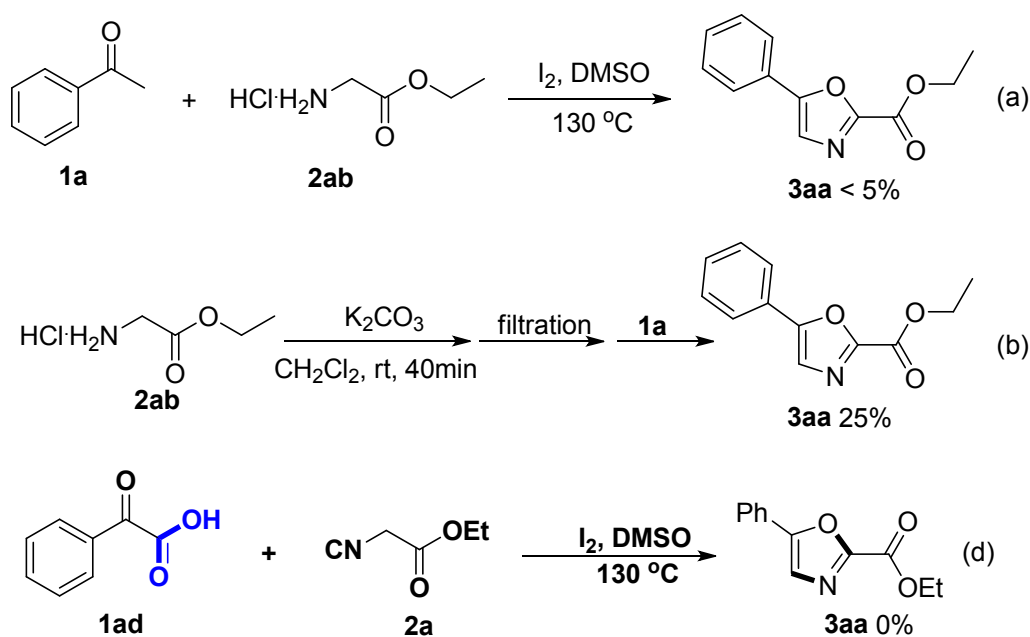

To gain insight into the mechanism of the reaction, the following experiments were performed. Ethyl 2-aminoacetate hydrochloride **2ab** reacted with aryl methyl ketone **1a** to afford the product **3aa** in lower yield. Then, in order to improve the yield, the substrate **2ab** was reacted with  $K_2CO_3$  in order to remove the hydrochloric acid and subsequently react with acetophenone **1a** could provide desired product **3aa** in 25% yield. These results clearly confirm the intermediacy of ethyl 2-aminoacetate **2aa** in the transformation. Moreover, 2-oxo-2-phenylacetic acid **1ad** was reacted with **2a** under the standard conditions, but target product **3aa** was not obtained. This result indicates that **1ad** is not the intermediate to construct 2,5-disubstituted oxazoles in this transformation.

### 7. Characterization data for compounds **3**

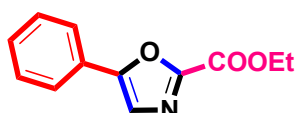

#### ethyl 5-phenyloxazole-2-carboxylate (**3aa**):

Yield 75%; 162.9 mg; yellow solid; mp 52–55 °C; IR (KBr): 1276, 1447, 1382, 1181, 1126, 764, 690  $cm^{-1}$ ;  $^1H$  NMR (600 MHz,  $CDCl_3$ ):  $\delta$  (ppm) 7.76 (d,  $J = 7.2$  Hz, 2H), 7.52 (s, 1H), 7.46 (t,  $J = 7.8$  Hz, 2H), 7.41 (t,  $J = 7.2$  Hz, 1H), 4.54–7.46 (m, 2H), 1.46 (t,  $J = 7.2$  Hz, 3H);  $^{13}C$  NMR (100 MHz,  $CDCl_3$ )  $\delta$  (ppm) 155.6, 154.2, 151.5, 129.7, 129.0, 126.6, 125.0, 123.8, 62.5, 14.1; HRMS (ESI):  $m/z$   $[M+Na]^+$  calcd for  $C_{12}H_{11}NNaO_3$ : 240.0631; found: 240.0635.

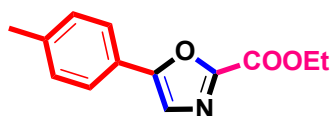

#### ethyl 5-(p-tolyl)oxazole-2-carboxylate (**3ba**):

Yield 74%; 171.25 mg; light yellow solid; mp 90–93 °C; IR (KBr): 1737, 1526, 1490, 1381, 1175, 1129, 819  $cm^{-1}$ ;  $^1H$  NMR (600 MHz,  $CDCl_3$ ):  $\delta$  (ppm) 7.65 (d,  $J = 7.8$  Hz, 2H), 7.47 (s, 1H), 7.26 (d,  $J = 8.4$  Hz, 2H), 4.55–4.46 (m, 2H), 2.40 (s, 3H), 1.46 (t,  $J = 7.2$  Hz, 3H);  $^{13}C$  NMR (150 MHz,  $CDCl_3$ )  $\delta$  (ppm) 155.7, 154.5, 151.3, 140.1, 129.7, 125.0, 123.9, 123.2, 62.5, 21.4, 14.2; HRMS (ESI):  $m/z$   $[M+Na]^+$  calcd for  $C_{13}H_{13}NNaO_3$ : 254.0788; found: 254.0785.

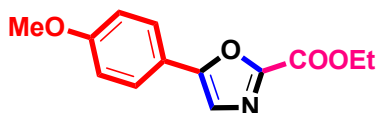

#### ethyl 5-(4-methoxyphenyl)oxazole-2-carboxylate (**3ca**):

Yield 79%; 195.3 mg; light yellow solid; mp 70–73 °C; IR (KBr): 1729, 1612, 1488, 1264, 1179, 1152, 1122, 1020  $cm^{-1}$ ;  $^1H$  NMR (600 MHz,  $CDCl_3$ ):  $\delta$  (ppm) 7.70 (d,  $J = 8.4$  Hz, 2H), 7.41 (s, 1H), 6.98 (d,  $J = 9.0$  Hz, 2H), 4.53–4.44 (m, 2H), 3.86 (s, 3H), 1.46 (t,  $J = 7.2$  Hz, 3H);  $^{13}C$  NMR (150 MHz,  $CDCl_3$ )  $\delta$  (ppm) 160.8, 155.8, 154.5,

151.0, 126.7, 122.4, 119.4, 114.5, 62.5, 55.4, 14.2; HRMS (ESI):  $m/z$   $[M+Na]^+$  calcd for  $C_{13}H_{13}NNaO_4$ : 270.0737; found: 270.0740.

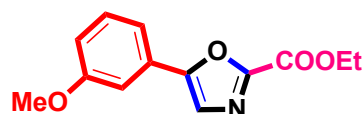

**ethyl 5-(3-methoxyphenyl)oxazole-2-carboxylate (3da):**

Yield 80%; 197.8 mg; light yellow solid; mp 60–63 °C; IR (KBr): 1731, 1638, 1620, 1231, 1182, 1125, 623  $cm^{-1}$ ;  $^1H$  NMR (600 MHz,  $CDCl_3$ ):  $\delta$  (ppm) 7.52 (s, 1H), 7.39–7.31 (m, 2H), 7.27 (s, 1H), 6.95 (d,  $J = 7.2$  Hz, 1H), 4.56–4.43 (m, 2H), 3.87 (s, 3H), 1.46 (t,  $J = 7.2$  Hz, 3H);  $^{13}C$  NMR (150 MHz,  $CDCl_3$ )  $\delta$  (ppm) 160.0, 155.6, 154.1, 151.5, 130.1, 127.8, 124.1, 117.5, 115.6, 110.2, 62.5, 55.4, 14.1; HRMS (ESI):  $m/z$   $[M+Na]^+$  calcd for  $C_{13}H_{13}NNaO_4$ : 270.0737; found: 270.0734.

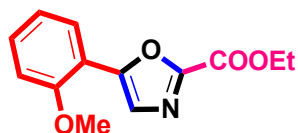

**ethyl 5-(2-methoxyphenyl)oxazole-2-carboxylate (3ea):**

Yield 83%; 205.2 mg; yellow solid; mp 103–106 °C; IR (KBr): 1733, 1512, 1378, 1306, 1264, 1177, 1128, 757  $cm^{-1}$ ;  $^1H$  NMR (600 MHz,  $CDCl_3$ ):  $\delta$  (ppm) 7.93 (d,  $J = 7.8$  Hz, 1H), 7.71 (s, 1H), 7.37 (t,  $J = 7.2$  Hz, 1H), 7.07 (t,  $J = 7.8$  Hz, 1H), 6.99 (d,  $J = 8.4$  Hz, 1H), 4.56–4.44 (m, 2H), 3.98 (s, 3H), 1.46 (t,  $J = 7.2$  Hz, 3H);  $^{13}C$  NMR (150 MHz,  $CDCl_3$ )  $\delta$  (ppm) 156.2, 155.8, 150.9, 150.4, 130.5, 127.8, 126.8, 120.9, 115.8, 110.9, 62.4, 55.4, 14.1; HRMS (ESI):  $m/z$   $[M+Na]^+$  calcd for  $C_{13}H_{13}NNaO_4$ : 270.0737; found: 270.0742.

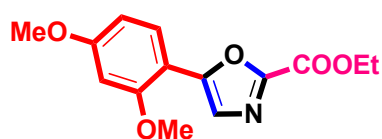

**ethyl 5-(2,4-dimethoxyphenyl)oxazole-2-carboxylate (3fa):**

Yield 81%; 224.6 mg; yellow solid; mp 65–67 °C; IR (KBr): 2293, 2852, 1729, 1613, 1463, 1269, 1216, 1178, 1021  $cm^{-1}$ ;  $^1H$  NMR (600 MHz,  $CDCl_3$ ):  $\delta$  (ppm) 7.85 (d,  $J = 8.4$  Hz, 1H), 7.58 (s, 1H), 6.60 (d,  $J = 8.4$  Hz, 1H), 6.54 (s, 1H), 4.51–4.44 (m, 2H), 3.96 (s, 4H), 3.86 (s, 4H), 1.46 (t,  $J = 7.2$  Hz, 3H);  $^{13}C$  NMR (150 MHz,  $CDCl_3$ )  $\delta$  (ppm) 162.2, 158.0, 156.2, 151.6, 150.2, 128.2, 126.3, 109.4, 105.5, 98.7, 62.6, 55.83, 55.78, 14.5; HRMS (ESI):  $m/z$   $[M+Na]^+$  calcd for  $C_{14}H_{15}NNaO_5$ : 300.0842; found: 300.0841.

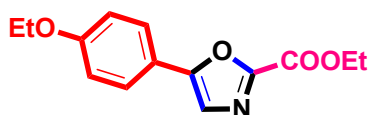

**ethyl 5-(4-ethoxyphenyl)oxazole-2-carboxylate (3ga):**

Yield 71%; 185.5 mg; light yellow solid; mp 100–103 °C; IR (KBr): 1730, 1616, 1492, 1246, 1182, 1154, 1124, 694  $\text{cm}^{-1}$ ;  $^1\text{H}$  NMR (600 MHz,  $\text{CDCl}_3$ ):  $\delta$  (ppm) 7.68 (d,  $J = 8.4$  Hz, 2H), 7.40 (s, 1H), 6.96 (d,  $J = 8.4$  Hz, 2H), 4.53–4.55 (m, 2H), 4.12–4.00 (m, 2H), 1.51–1.40 (m, 6H);  $^{13}\text{C}$  NMR (150 MHz,  $\text{CDCl}_3$ )  $\delta$  (ppm) 160.2, 155.7, 154.5, 151.0, 126.7, 122.4, 119.1, 114.9, 63.6, 62.4, 14.7, 14.2; HRMS (ESI):  $m/z$   $[\text{M}+\text{Na}]^+$  calcd for  $\text{C}_{14}\text{H}_{15}\text{NNaO}_4$ : 284.0893; found: 284.0899.

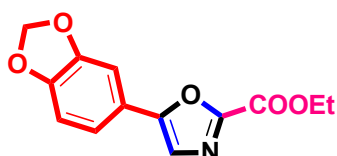

**ethyl 5-(benzo[*d*][1,3]dioxol-5-yl)oxazole-2-carboxylate (3ha):**

Yield 69%; 180.2 mg; light yellow solid; mp 127–130 °C; IR (KBr): 1719, 1473, 1446, 1331, 1234, 1177, 1041  $\text{cm}^{-1}$ ;  $^1\text{H}$  NMR (600 MHz,  $\text{CDCl}_3$ ):  $\delta$  (ppm) 7.38 (s, 1H), 7.27 (d,  $J = 8.4$  Hz, 1H), 7.19 (s, 1H), 6.88 (d,  $J = 7.8$  Hz, 1H), 6.03 (s, 2H), 4.53–4.45 (m, 2H), 1.46 (t,  $J = 7.2$  Hz, 3H);  $^{13}\text{C}$  NMR (150 MHz,  $\text{CDCl}_3$ )  $\delta$  (ppm) 155.6, 154.1, 151.0, 148.9, 148.2, 122.7, 120.6, 119.6, 108.8, 105.3, 101.5, 62.4, 14.1; HRMS (ESI):  $m/z$   $[\text{M}+\text{Na}]^+$  calcd for  $\text{C}_{13}\text{H}_{11}\text{NNaO}_5$ : 284.0529; found: 284.0532.

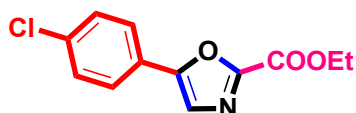

**ethyl 5-(4-chlorophenyl)oxazole-2-carboxylate (3ia):**

Yield 75%; 188.8 mg; light yellow solid; mp 99–102 °C; IR (KBr): 1726, 1477, 1411, 1184, 1127, 1090, 833  $\text{cm}^{-1}$ ;  $^1\text{H}$  NMR (600 MHz,  $\text{CDCl}_3$ ):  $\delta$  (ppm) 7.70 (d,  $J = 8.4$  Hz, 2H), 7.52 (s, 1H), 7.44 (d,  $J = 8.4$  Hz, 2H), 4.54–4.44 (m, 2H), 1.46 (t,  $J = 7.2$  Hz, 3H);  $^{13}\text{C}$  NMR (150 MHz,  $\text{CDCl}_3$ )  $\delta$  (ppm) 155.5, 153.2, 151.7, 135.7, 129.3, 126.3, 125.1, 124.1, 62.7, 14.1; HRMS (ESI):  $m/z$   $[\text{M}+\text{Na}]^+$  calcd for  $\text{C}_{12}\text{H}_{10}\text{ClNNaO}_3$ : 274.0241; found: 274.0247.

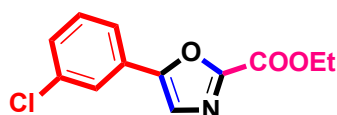

**ethyl 5-(3-chlorophenyl)oxazole-2-carboxylate (3ja):**

Yield 70%; 176.2 mg; light yellow solid; mp 122–125 °C; IR (KBr): 1723, 1646, 1620, 1187, 1151, 1130, 1118  $\text{cm}^{-1}$ ;  $^1\text{H}$  NMR (300 MHz,  $\text{CDCl}_3$ ):  $\delta$  (ppm) 7.76 (s, 1H), 7.68–7.62 (m, 1H), 7.55 (s, 1H), 7.43–7.37 (m, 2H), 4.57–4.44 (m, 2H), 1.47 (t,  $J = 7.2$  Hz,



3H);  $^{13}\text{C}$  NMR (75 MHz,  $\text{CDCl}_3$ )  $\delta$  (ppm) 155.6, 152.8, 152.0, 135.3, 130.4, 129.8, 128.3, 125.1, 124.7, 123.2, 62.8, 14.2; HRMS (ESI):  $m/z$   $[\text{M}+\text{Na}]^+$  calcd for  $\text{C}_{12}\text{H}_{10}\text{CINNaO}_3$ : 274.0241; found: 274.0244.

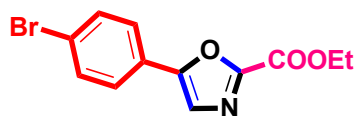

**ethyl 5-(4-bromophenyl)oxazole-2-carboxylate (3ka):**

Yield 78%; 231.0 mg; light yellow solid; mp 101–104 °C; IR (KBr): 1724, 1475, 1408, 1279, 1182, 834  $\text{cm}^{-1}$ ;  $^1\text{H}$  NMR (600 MHz,  $\text{CDCl}_3$ ):  $\delta$  (ppm) 7.63 (d,  $J = 8.4$  Hz, 2H), 7.59 (d,  $J = 8.4$  Hz, 2H), 7.54 (s, 1H), 4.54–4.46 (m, 2H), 1.46 (t,  $J = 7.2$  Hz, 3H);  $^{13}\text{C}$  NMR (150 MHz,  $\text{CDCl}_3$ )  $\delta$  (ppm) 155.5, 153.2, 151.7, 132.2, 126.4, 125.5, 124.2, 124.0, 62.7, 14.1; HRMS (ESI):  $m/z$   $[\text{M}+\text{Na}]^+$  calcd for  $\text{C}_{12}\text{H}_{10}\text{BrNNaO}_3$ : 317.9736; found: 317.9742.

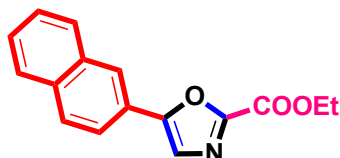

**ethyl 5-(naphthalen-2-yl)oxazole-2-carboxylate (3la):**

Yield 77%; 205.8 mg; light yellow solid; mp 76–78 °C; IR (KBr): 1724, 1333, 1178, 1127, 747  $\text{cm}^{-1}$ ;  $^1\text{H}$  NMR (600 MHz,  $\text{CDCl}_3$ ):  $\delta$  (ppm) 8.28 (s, 1H), 7.91 (d,  $J = 8.4$  Hz, 2H), 7.87–7.82 (m, 1H), 7.78 (d,  $J = 8.4$  Hz, 1H), 7.63 (s, 1H), 7.56–7.52 (m, 2H), 4.56–4.47 (m, 2H), 1.48 (t,  $J = 7.2$  Hz, 3H);  $^{13}\text{C}$  NMR (150 MHz,  $\text{CDCl}_3$ )  $\delta$  (ppm) 155.7, 154.4, 151.7, 133.6, 133.1, 128.9, 128.5, 127.8, 127.2, 127.0, 124.7, 124.2, 123.8, 122.1, 62.7, 14.2; HRMS (ESI):  $m/z$   $[\text{M}+\text{Na}]^+$  calcd for  $\text{C}_{16}\text{H}_{13}\text{NNaO}_3$ : 290.0788; found: 290.0791.

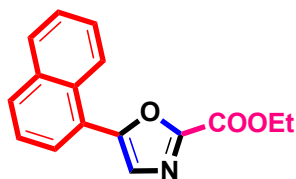

**ethyl 5-(naphthalen-1-yl)oxazole-2-carboxylate (3ma):**

Yield 81%; 216.5 mg; deep yellow solid; mp 60–63 °C; IR (KBr): 1729, 1261, 1179, 1107, 1021, 804  $\text{cm}^{-1}$ ;  $^1\text{H}$  NMR (600 MHz,  $\text{CDCl}_3$ ):  $\delta$  (ppm) 8.27 (d,  $J = 8.4$  Hz, 1H), 7.97–7.89 (m, 2H), 7.84 (d,  $J = 7.2$  Hz, 1H), 7.63 (s, 1H), 7.60 (d,  $J = 7.2$  Hz, 1H), 7.58–7.51 (m, 2H), 4.56–4.49 (m, 2H), 1.48 (t,  $J = 7.2$  Hz, 3H);  $^{13}\text{C}$  NMR (150 MHz,  $\text{CDCl}_3$ )  $\delta$  (ppm) 155.7, 153.6, 152.0, 133.7, 130.7, 129.9, 128.8, 127.5, 127.4, 127.2, 126.4, 125.1, 124.4, 123.8, 62.6, 14.2; HRMS (ESI):  $m/z$   $[\text{M}+\text{Na}]^+$  calcd for  $\text{C}_{16}\text{H}_{13}\text{NNaO}_3$ : 290.0788; found: 290.0785.

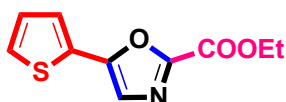

**ethyl 5-(thiophen-2-yl)oxazole-2-carboxylate (3na):**

Yield 81%; 180.8 mg; yellow oil; IR (KBr): 1736, 1530, 1277, 1181, 1119  $\text{cm}^{-1}$ ;  $^1\text{H}$  NMR (600 MHz,  $\text{CDCl}_3$ ):  $\delta$  (ppm) 7.52-7.46 (m, 1H), 7.45-7.41 (m, 1H), 7.39 (s, 1H), 7.13-7.10 (m, 1H), 4.54-4.46 (m, 2H), 1.46 (t,  $J = 7.2$  Hz, 3H);  $^{13}\text{C}$  NMR (150 MHz,  $\text{CDCl}_3$ )  $\delta$  (ppm) 155.4, 150.8, 149.7, 128.1, 128.0, 127.5, 126.4, 123.2, 62.6, 14.1; HRMS (ESI):  $m/z$   $[\text{M}+\text{Na}]^+$  calcd for  $\text{C}_{10}\text{H}_9\text{NNaO}_3\text{S}$ : 246.0195; found: 246.0195.

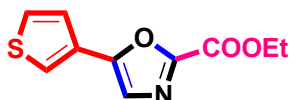

**ethyl 5-(thiophen-3-yl)oxazole-2-carboxylate (3oa):**

Yield 75%; 167.4 mg; deep yellow solid; mp 70–73  $^\circ\text{C}$ ; IR (KBr): 1722, 1531, 1337, 1179, 1125  $\text{cm}^{-1}$ ;  $^1\text{H}$  NMR (600 MHz,  $\text{CDCl}_3$ ):  $\delta$  (ppm) 7.77-7.73 (m, 1H), 7.45-7.41 (m, 1H), 7.40-7.36 (m, 2H), 4.55-4.46 (m, 3H), 1.46 (t,  $J = 7.2$  Hz, 4H);  $^{13}\text{C}$  NMR (150 MHz,  $\text{CDCl}_3$ )  $\delta$  (ppm) 155.6, 150.9, 127.7, 127.3, 124.6, 123.4, 123.3, 62.6, 14.1; HRMS (ESI):  $m/z$   $[\text{M}+\text{Na}]^+$  calcd for  $\text{C}_{10}\text{H}_9\text{NNaO}_3\text{S}$ : 246.0195; found: 246.0192.

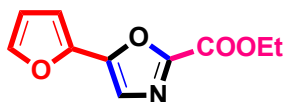

**ethyl 5-(furan-2-yl)oxazole-2-carboxylate (3pa):**

Yield 82%; 158.4 mg; yellow solid; mp 35–37  $^\circ\text{C}$ ; IR (KBr): 1739, 1547, 1290, 1182, 1155, 1118, 1015  $\text{cm}^{-1}$ ;  $^1\text{H}$  NMR (600 MHz,  $\text{CDCl}_3$ ):  $\delta$  (ppm) 7.54 (s, 1H), 7.43 (s, 1H), 6.88 (d,  $J = 3.0$  Hz, 1H), 6.57-6.52 (m, 1H), 4.54-4.46 (m, 2H), 1.46 (t,  $J = 7.2$  Hz, 3H);  $^{13}\text{C}$  NMR (150 MHz,  $\text{CDCl}_3$ )  $\delta$  (ppm) 155.5, 150.9, 146.4, 144.0, 142.3, 123.4, 111.9, 109.9, 62.7, 14.1; HRMS (ESI):  $m/z$   $[\text{M}+\text{Na}]^+$  calcd for  $\text{C}_{10}\text{H}_9\text{NNaO}_4$ : 230.0424; found: 230.0427.

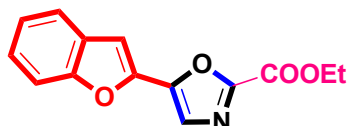

**ethyl 5-(benzofuran-2-yl)oxazole-2-carboxylate (3qa):**

Yield 62%; 159.5 mg; deep yellow solid; mp 69–72  $^\circ\text{C}$ ; IR (KBr): 1734, 1441, 1314, 1187, 1128, 747  $\text{cm}^{-1}$ ;  $^1\text{H}$  NMR (600 MHz,  $\text{CDCl}_3$ ):  $\delta$  (ppm) 7.64 (d,  $J = 7.8$  Hz, 2H), 7.53 (d,  $J = 8.4$  Hz, 1H), 7.38 (t,  $J = 7.8$  Hz, 1H), 7.29 (t,  $J = 7.8$  Hz, 1H), 7.23 (s, 1H), 4.57-4.48 (m, 2H), 1.48 (t,  $J = 7.2$  Hz, 3H);  $^{13}\text{C}$  NMR (150 MHz,  $\text{CDCl}_3$ )  $\delta$  (ppm) 155.4,

155.1, 151.8, 146.2, 143.7, 127.8, 126.0, 125.5, 123.7, 121.8, 111.4, 105.9, 62.9, 14.2; HRMS (ESI):  $m/z$   $[M+Na]^+$  calcd for  $C_{14}H_{11}NNaO_4$ : 280.0580; found: 280.0583.

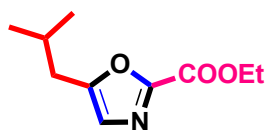

**ethyl 5-isobutyloxazole-2-carboxylate (3ra):**

Yield 75%; 147.9 mg; yellow oil; IR (KBr): 1739, 1524, 1383, 1179, 1154, 1123, 1044  $cm^{-1}$ ;  $^1H$  NMR (600 MHz,  $CDCl_3$ ):  $\delta$  (ppm) 6.98 (s, 1H), 4.51-4.43 (m, 2H), 2.62 (d,  $J = 7.2$  Hz, 2H), 2.08-2.01 (m, 1H), 1.43 (t,  $J = 7.2$  Hz, 3H), 0.97 (s, 3H), 0.96 (s, 3H);  $^{13}C$  NMR (150 MHz,  $CDCl_3$ )  $\delta$  (ppm) 156.2, 155.8, 151.6, 125.7, 62.4, 34.6, 27.5, 22.2, 14.2; HRMS (ESI):  $m/z$   $[M+Na]^+$  calcd for  $C_{10}H_{15}NNaO_3$ : 220.0944; found: 220.0945.

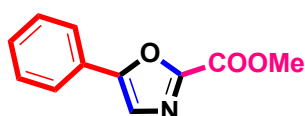

**methyl 5-phenyloxazole-2-carboxylate (3ab):**

Yield 80%; 162.6 mg; light yellow solid; mp 85–88 °C; IR (KBr): 1730, 1637, 1447, 1190, 1155, 1125, 1044, 774, 690  $cm^{-1}$ ;  $^1H$  NMR (600 MHz,  $CDCl_3$ ):  $\delta$  (ppm) 7.76 (d,  $J = 7.2$  Hz, 2H), 7.53 (s, 1H), 7.46 (t,  $J = 7.8$  Hz, 2H), 7.41 (t,  $J = 7.8$  Hz, 1H), 4.03 (s, 3H);  $^{13}C$  NMR (150 MHz,  $CDCl_3$ )  $\delta$  (ppm) 156.0, 154.3, 151.3, 129.8, 129.0, 126.5, 125.0, 123.8, 53.0; HRMS (ESI):  $m/z$   $[M+Na]^+$  calcd for  $C_{11}H_9NNaO_3$ : 226.0475; found: 226.0474.

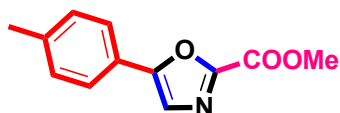

**methyl 5-(p-tolyl)oxazole-2-carboxylate (3bb):**

Yield 72%; 156.4 mg; light yellow solid; mp 82–84 °C; IR (KBr): 1727, 1493, 1372, 1207, 1176, 1131, 813  $cm^{-1}$ ;  $^1H$  NMR (600 MHz,  $CDCl_3$ ):  $\delta$  (ppm) 7.64 (d,  $J = 7.2$  Hz, 2H), 7.48 (s, 1H), 7.26 (d,  $J = 7.8$  Hz, 2H), 4.02 (s, 3H), 2.39 (s, 3H);  $^{13}C$  NMR (150 MHz,  $CDCl_3$ )  $\delta$  (ppm) 156.0, 154.6, 151.0, 140.1, 129.7, 125.0, 123.7, 123.3, 53.0, 21.4; HRMS (ESI):  $m/z$   $[M+Na]^+$  calcd for  $C_{12}H_{11}NNaO_3$ : 240.0631; found: 240.0628.

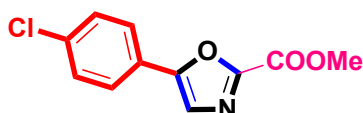

**ethyl 5-(4-chlorophenyl)oxazole-2-carboxylate (3ib):**

Yield 69%; 164.0 mg; yellow solid; mp 159–161 °C; IR (KBr): 1723, 1478, 1435, 1409, 1197, 1170, 1129, 1089  $cm^{-1}$ ;  $^1H$  NMR (600 MHz,  $CDCl_3$ ):  $\delta$  (ppm) 7.69 (d,  $J = 8.4$  Hz, 2H), 7.53 (s, 1H), 7.44 (d,  $J = 8.4$  Hz, 2H), 4.03 (s, 3H);  $^{13}C$  NMR (150 MHz,

CDCl<sub>3</sub>)  $\delta$  (ppm) 155.9, 153.3, 151.4, 135.8, 129.4, 126.3, 125.0, 124.2, 53.2; HRMS (ESI):  $m/z$  [M+Na]<sup>+</sup> calcd for C<sub>11</sub>H<sub>8</sub>ClNNaO<sub>3</sub>: 260.0085; found: 260.0089.

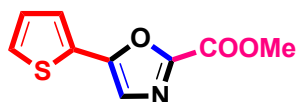

**ethyl 5-(thiophen-2-yl)oxazole-2-carboxylate (3nb):**

Yield 82%; 171.6 mg; yellow solid; mp 50–52 °C; IR (KBr): 1733, 1532, 1496, 1280, 1204, 1154, 1118 cm<sup>-1</sup>; <sup>1</sup>H NMR (600 MHz, CDCl<sub>3</sub>):  $\delta$  (ppm) 7.50 (d,  $J$  = 3.6 Hz, 1H), 7.44 (d,  $J$  = 4.8 Hz, 1H), 7.39 (s, 1H), 7.13 (t,  $J$  = 4.2 Hz, 1H), 4.03 (s, 3H); <sup>13</sup>C NMR (150 MHz, CDCl<sub>3</sub>)  $\delta$  (ppm) 155.8, 150.6, 149.8, 128.16, 128.11, 127.6, 126.5, 123.4, 53.2; HRMS (ESI):  $m/z$  [M+Na]<sup>+</sup> calcd for C<sub>9</sub>H<sub>7</sub>NNaO<sub>3</sub>S: 232.0039; found: 232.0042.

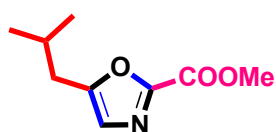

**methyl 5-isobutyloxazole-2-carboxylate (3rb):**

Yield 69%; 126.3 mg; yellow oli; IR (KBr): 1746, 1641, 1383, 1190, 1151, 1125, 1043 cm<sup>-1</sup>; <sup>1</sup>H NMR (600 MHz, CDCl<sub>3</sub>):  $\delta$  (ppm) 6.99 (s, 1H), 3.99 (s, 3H), 2.62 (d,  $J$  = 7.2 Hz, 2H), 2.11-2.01 (m, 1H), 0.97 (s, 3H), 0.96 (s, 3H); <sup>13</sup>C NMR (150 MHz, CDCl<sub>3</sub>)  $\delta$  (ppm) 156.3, 156.2, 151.4, 125.8, 53.0, 34.6, 27.5, 22.2; HRMS (ESI):  $m/z$  [M+Na]<sup>+</sup> calcd for C<sub>9</sub>H<sub>13</sub>ClNNaO<sub>3</sub>: 206.0788; found: 206.0783.

**8. Crystallographic data and molecular structure of compounds 3ga**

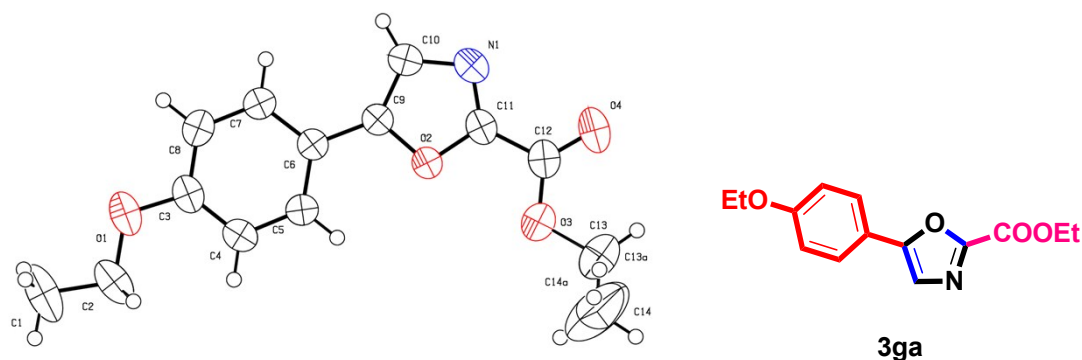

**Figure S2.** X-ray crystal structure of **3ga**

Crystal Data for Compound **3ga**: CCDC 1511246 contains the supplementary crystallographic data for this paper. These data can be obtained free of charge from The Cambridge Crystallographic.



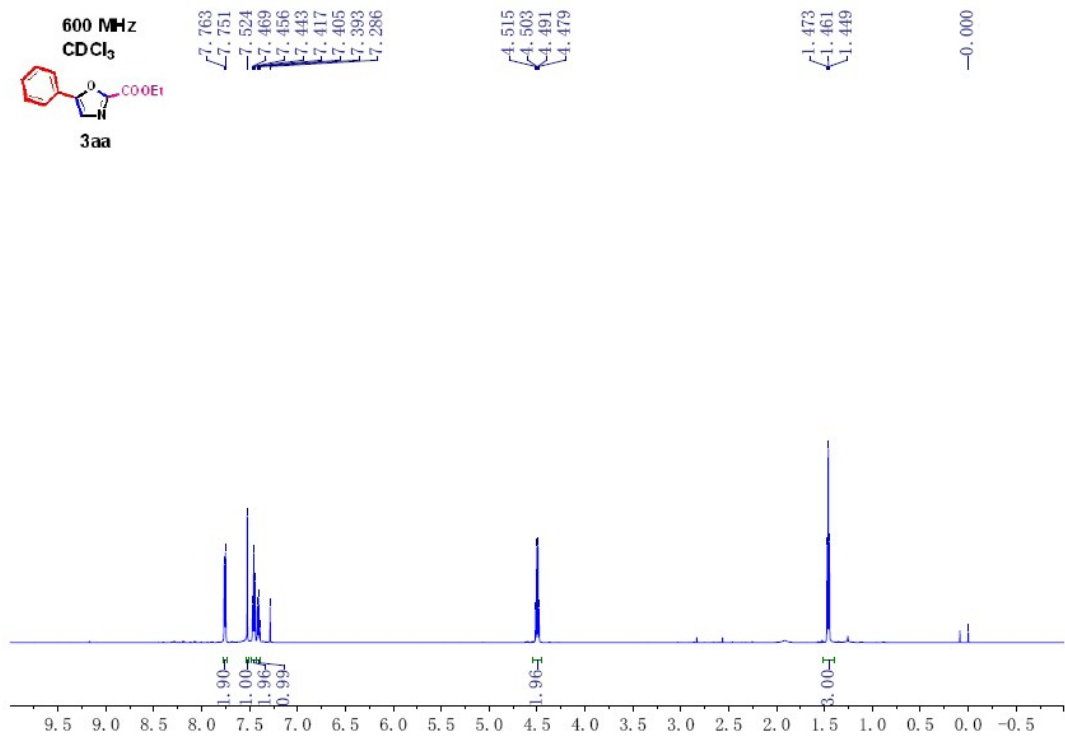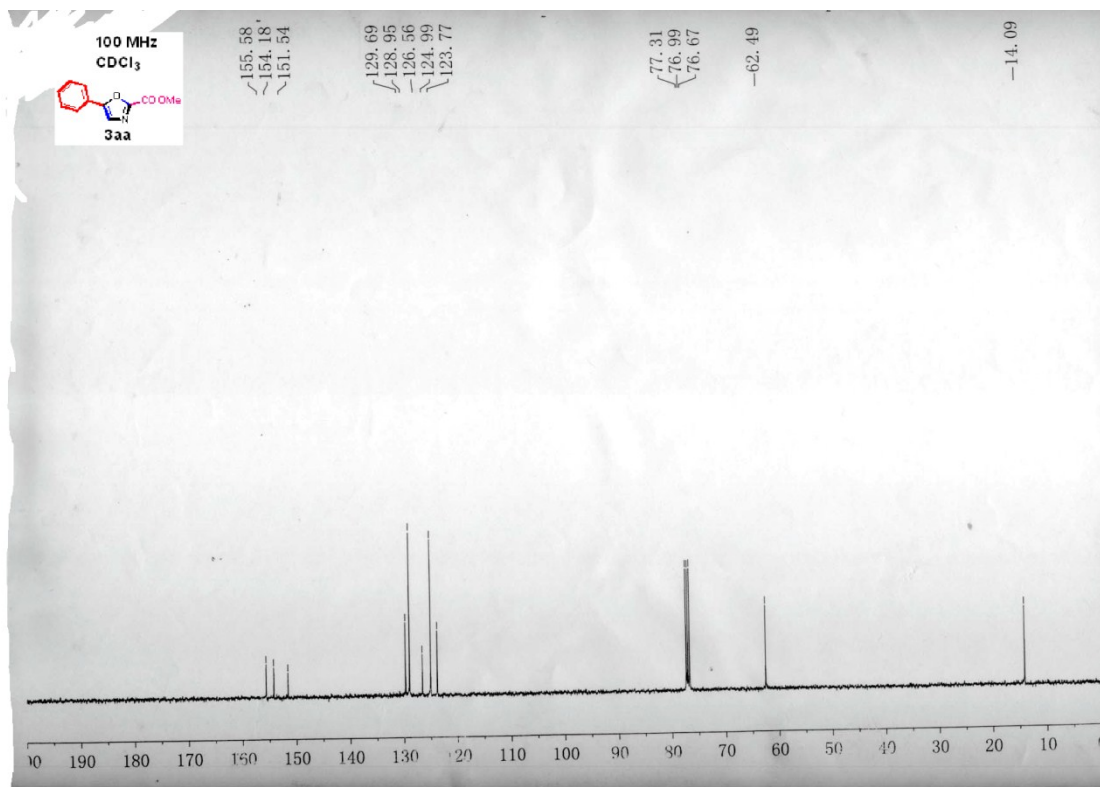

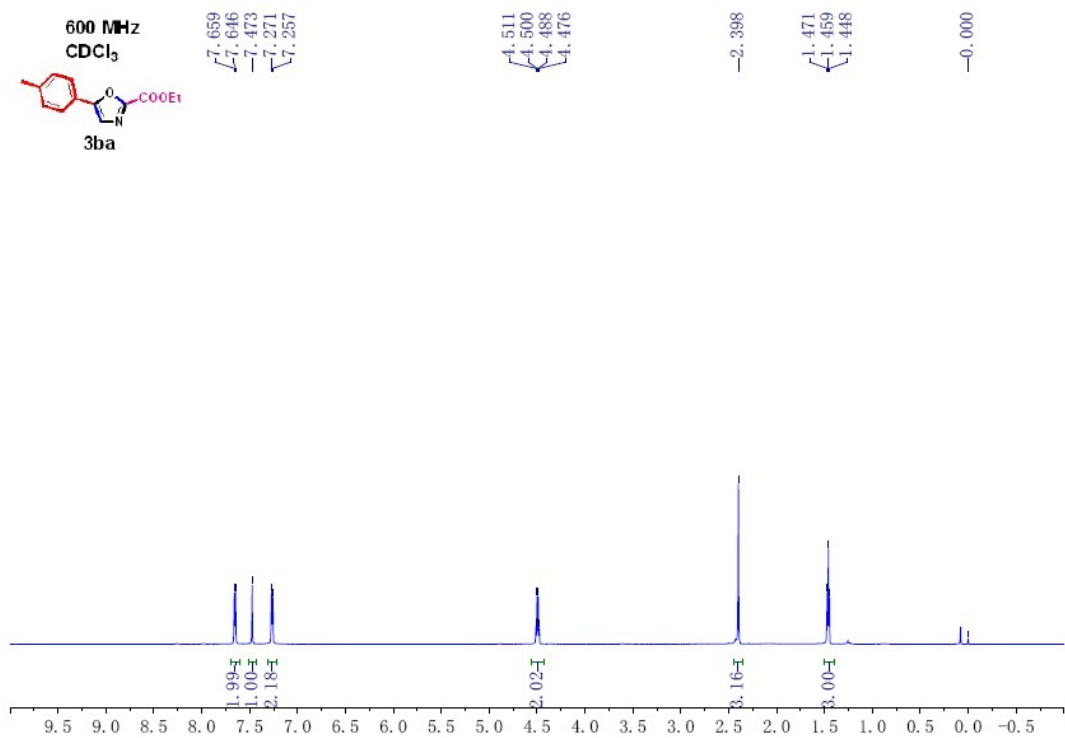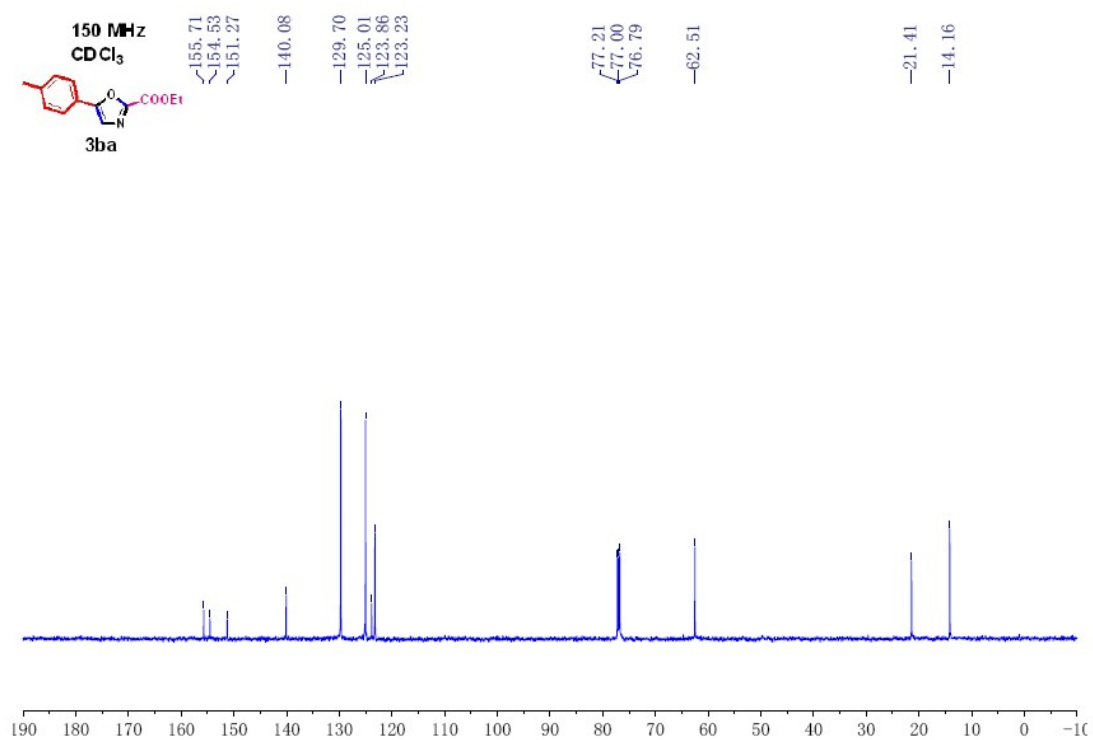

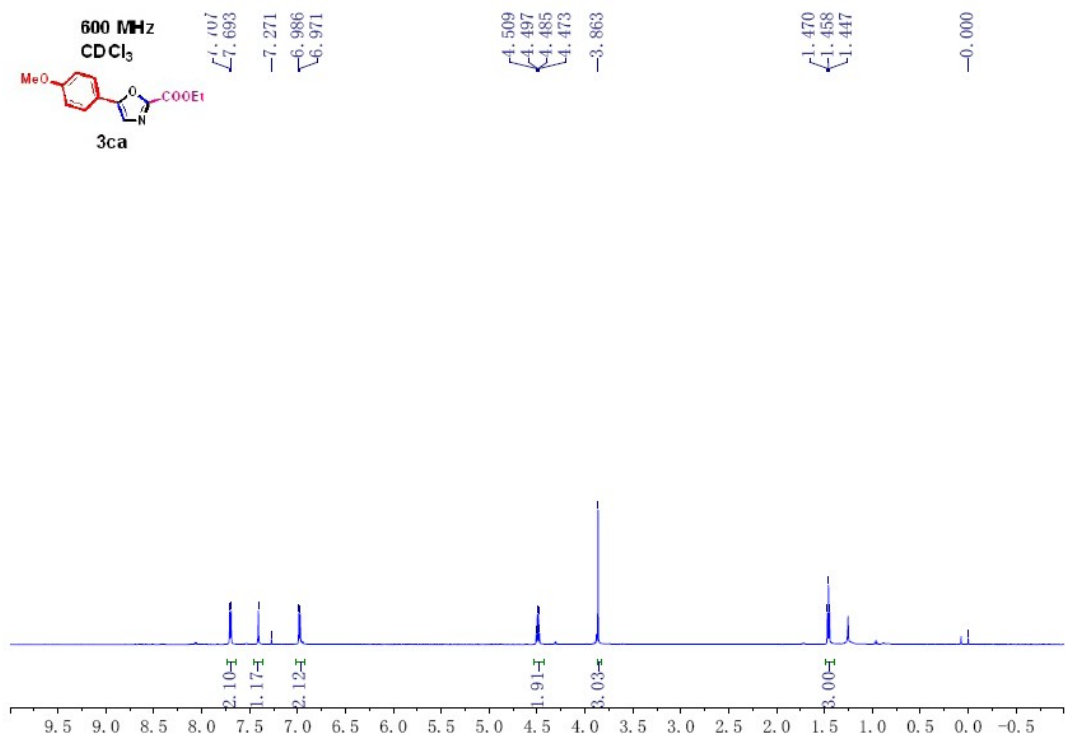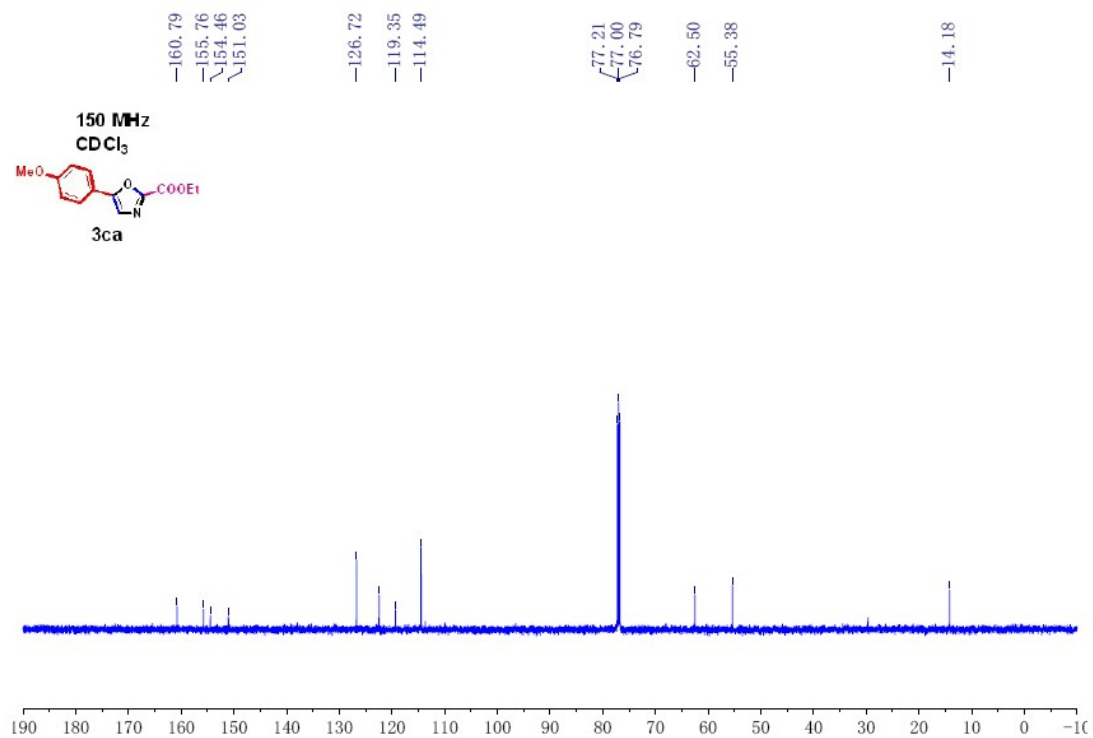



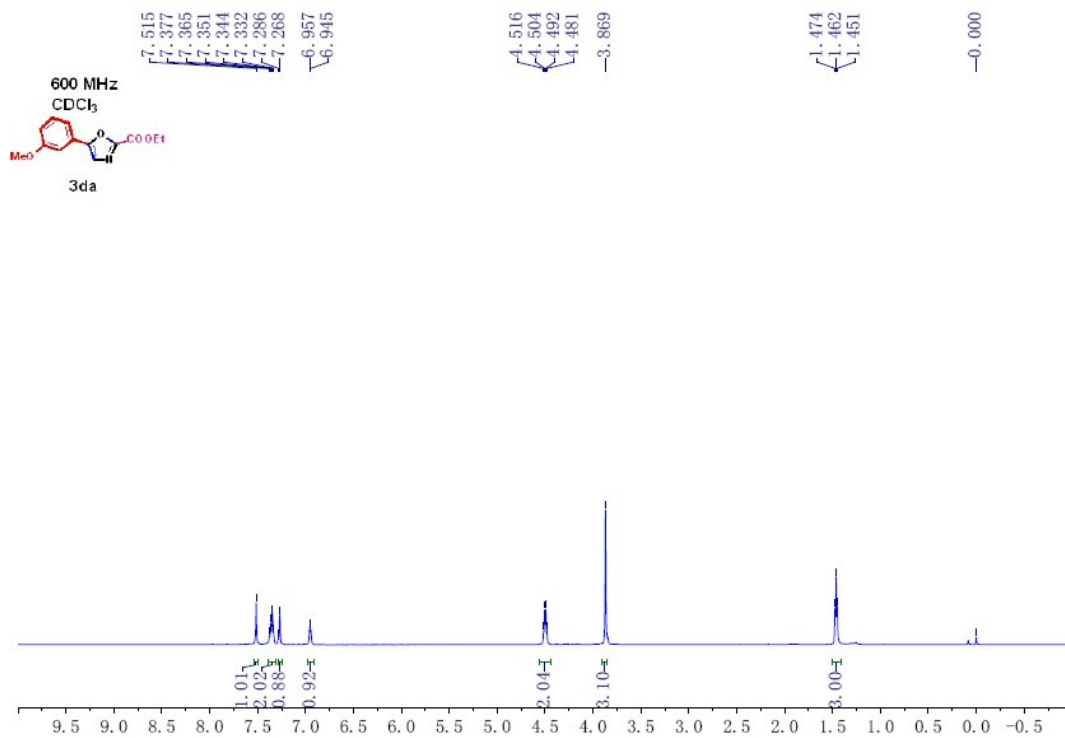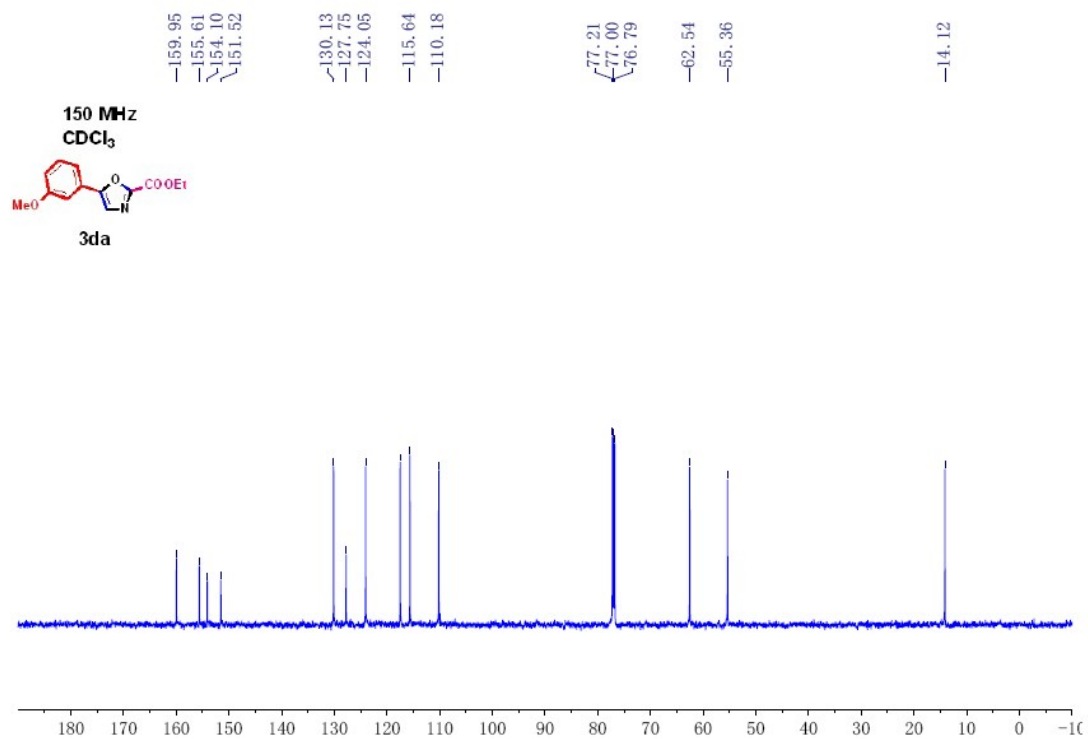

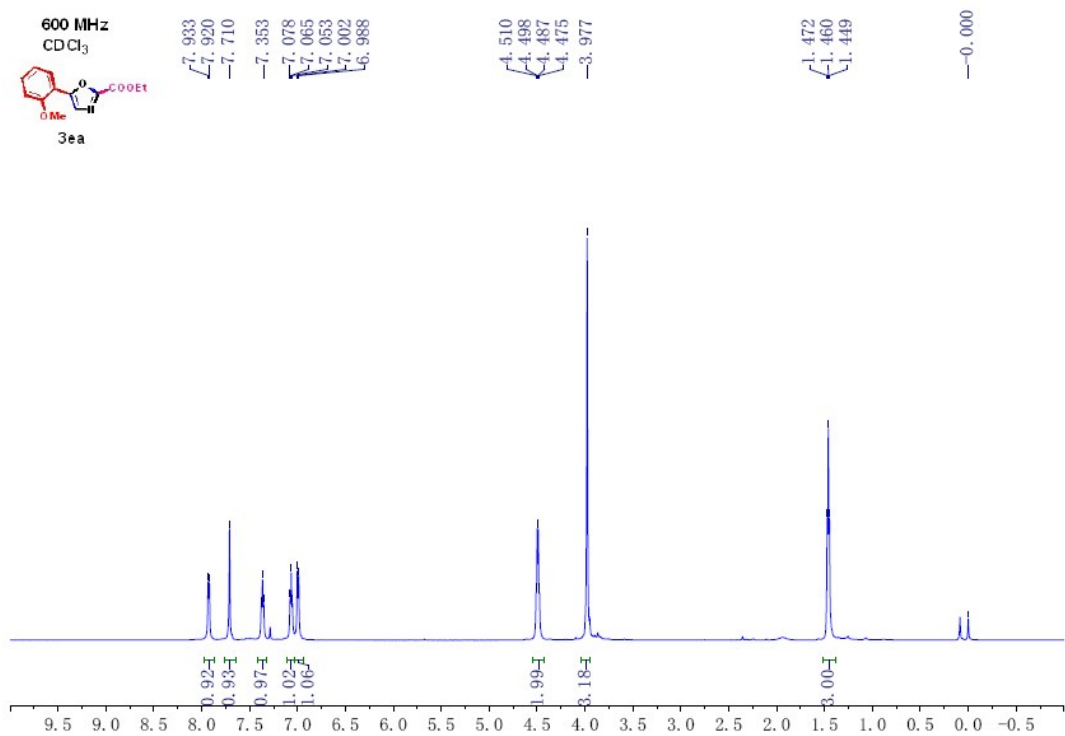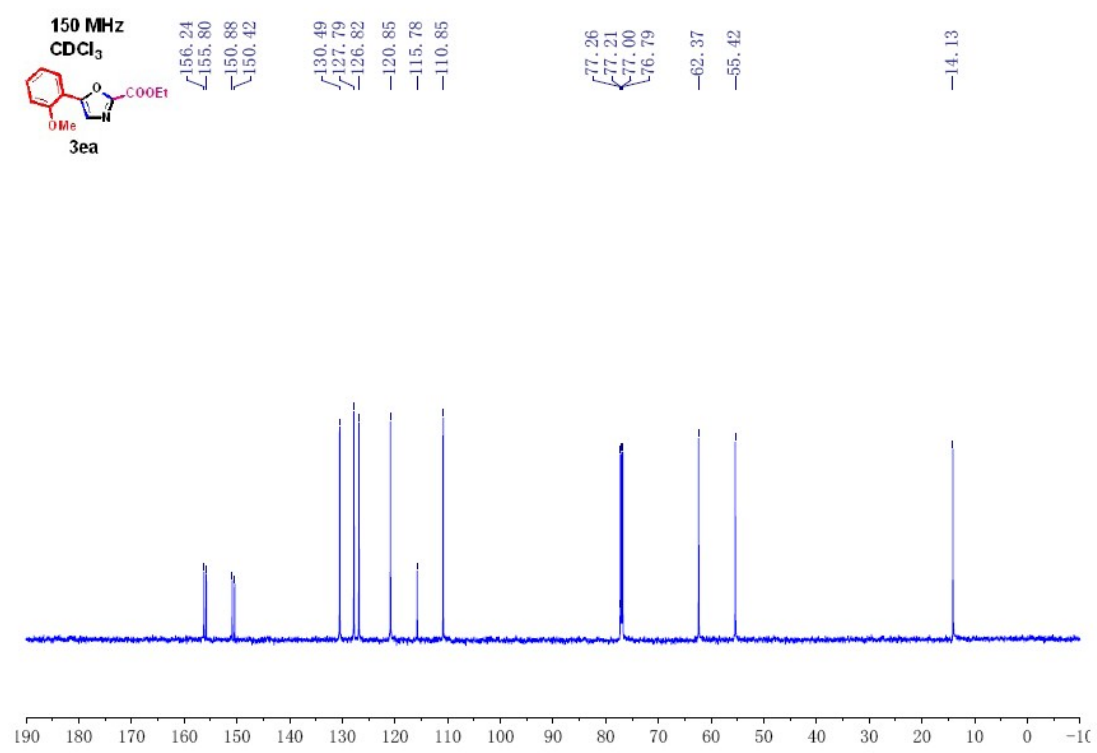

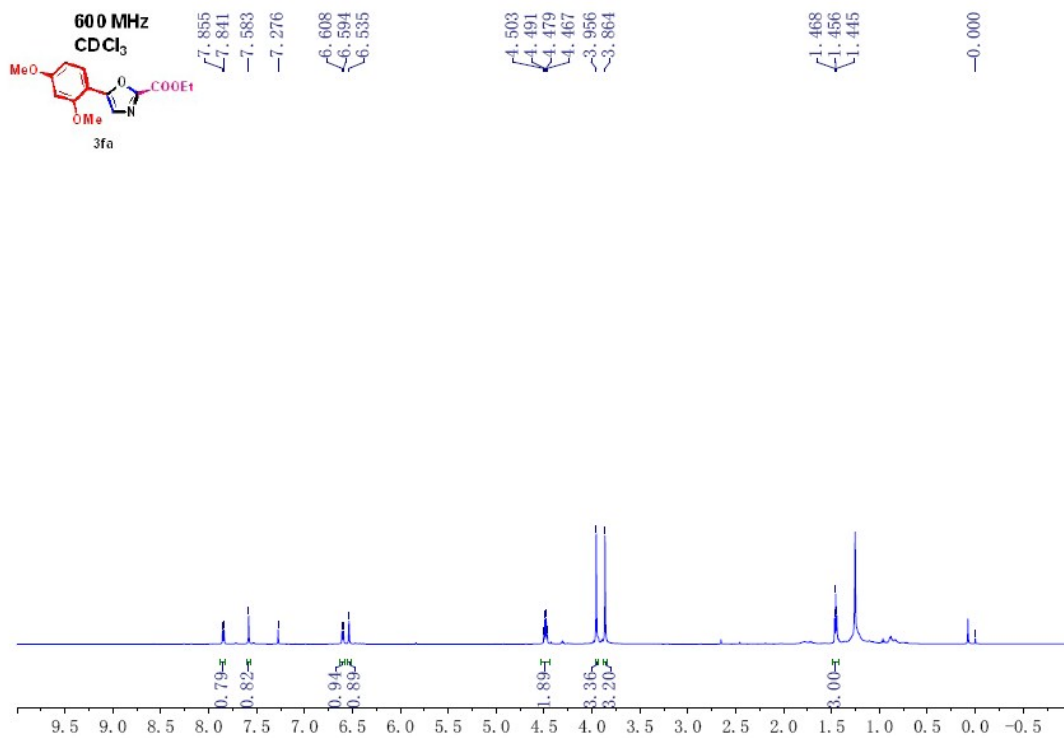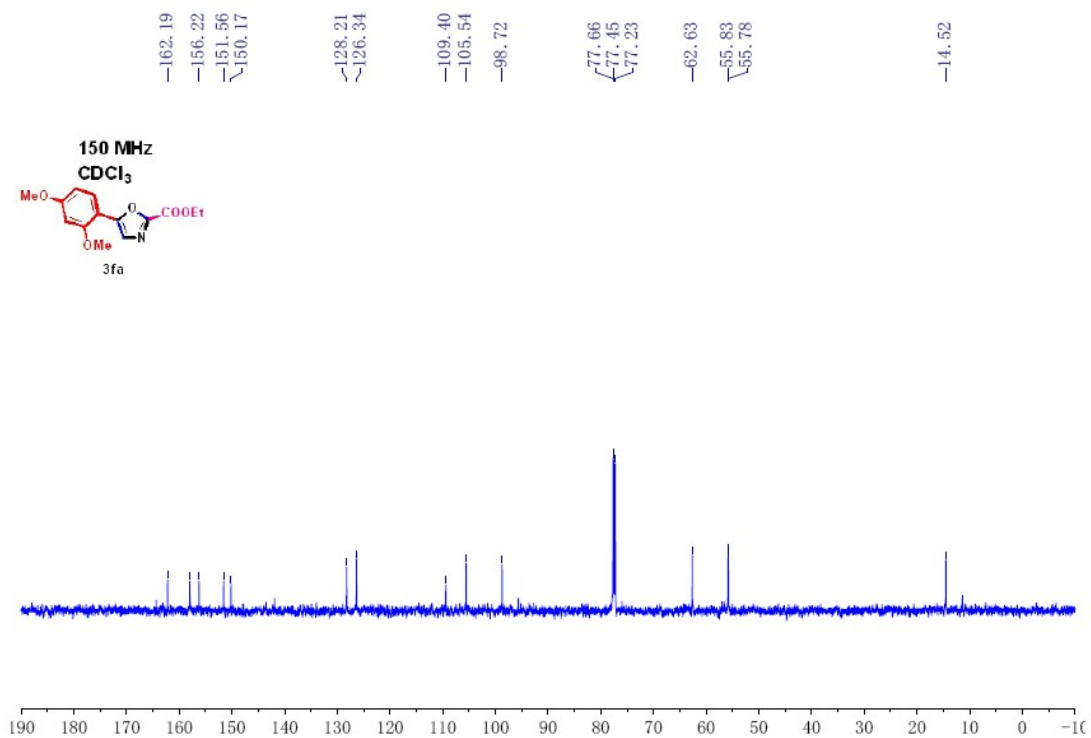

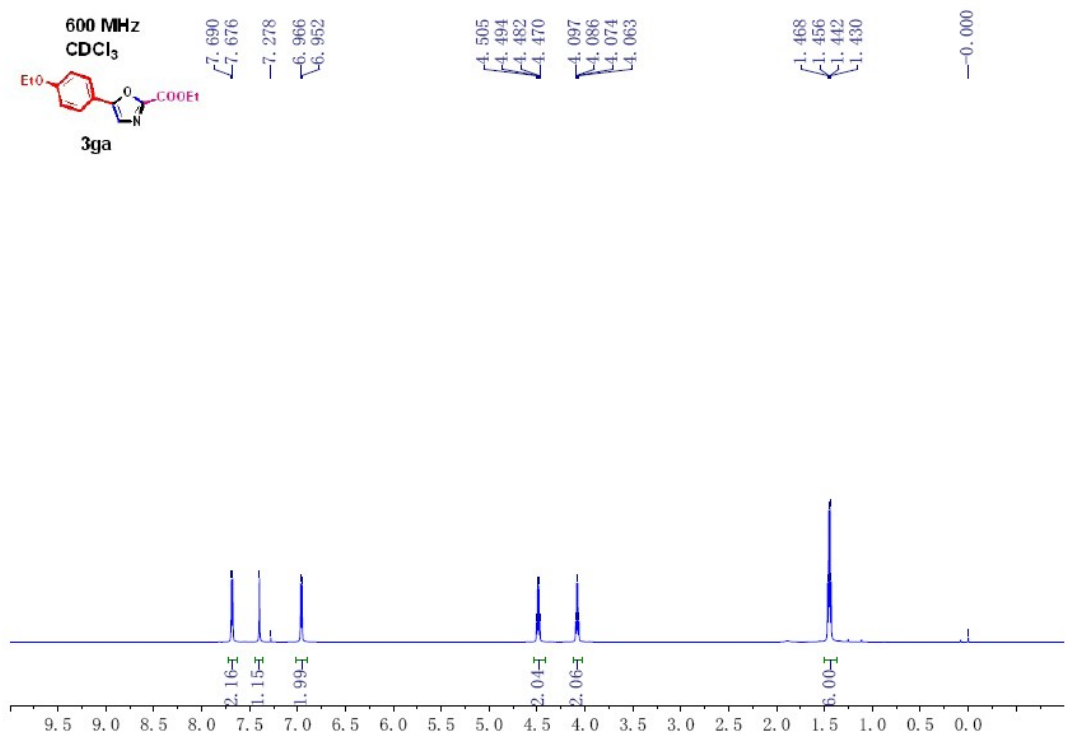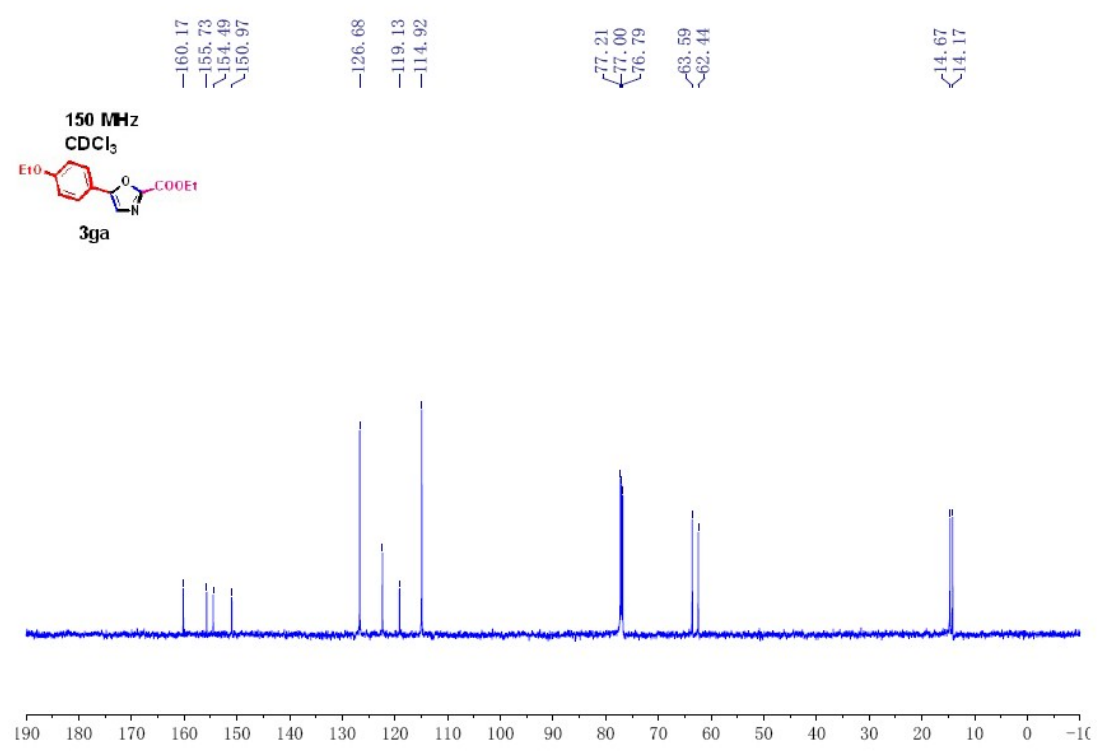

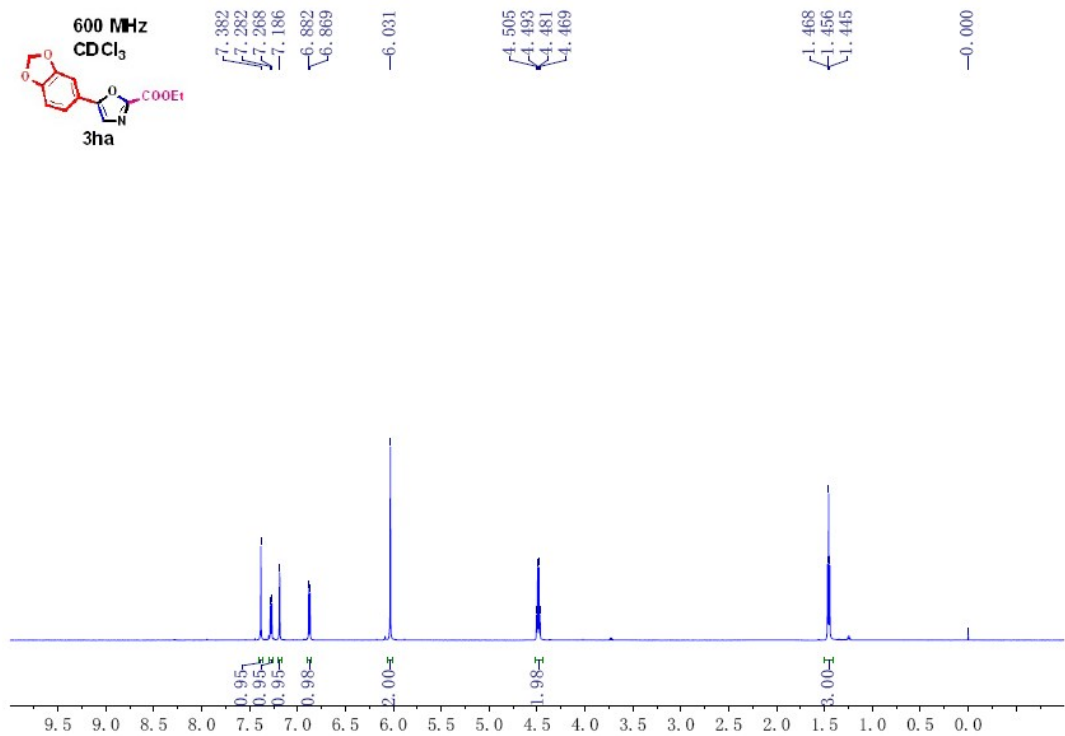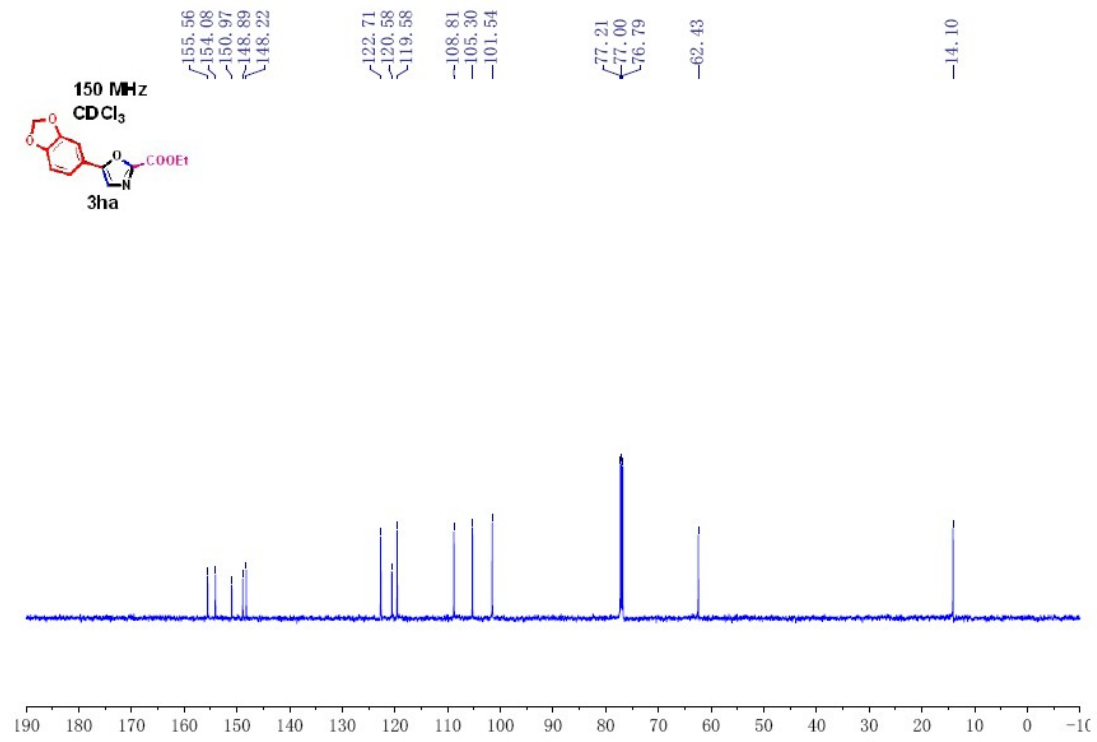

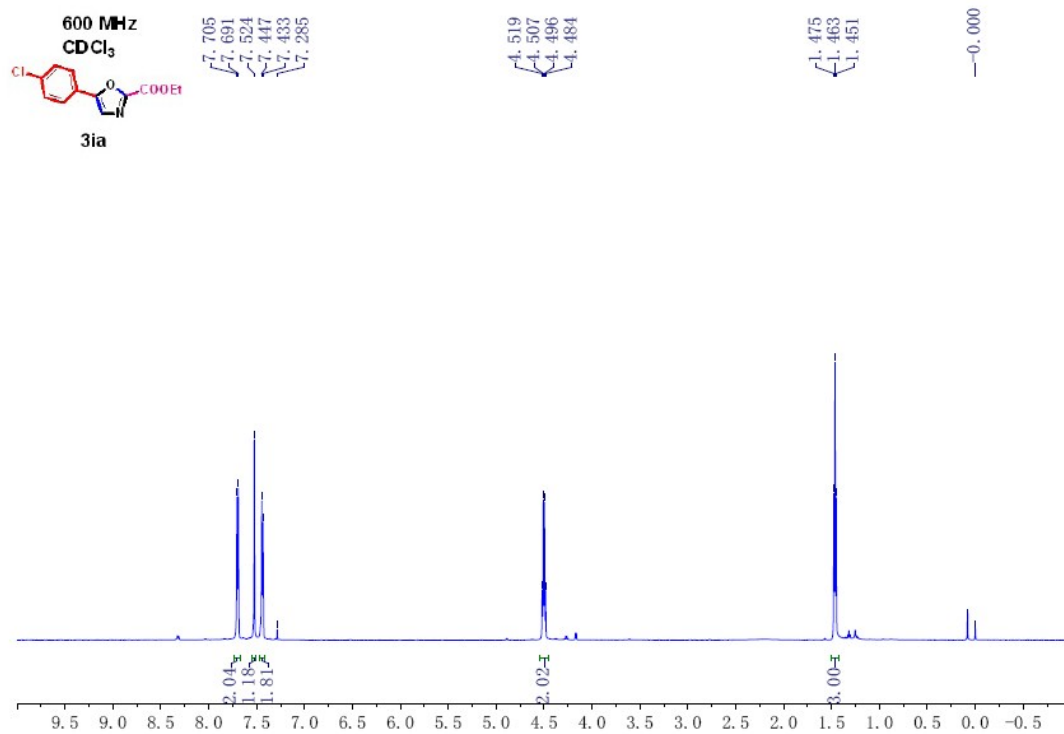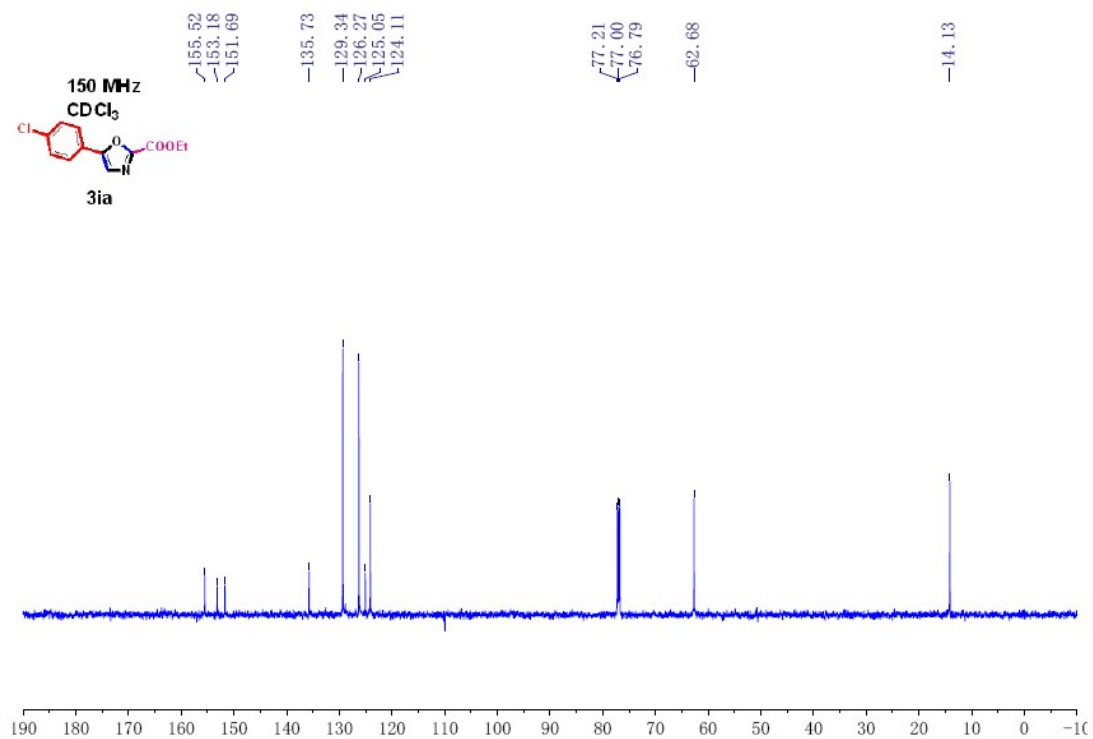

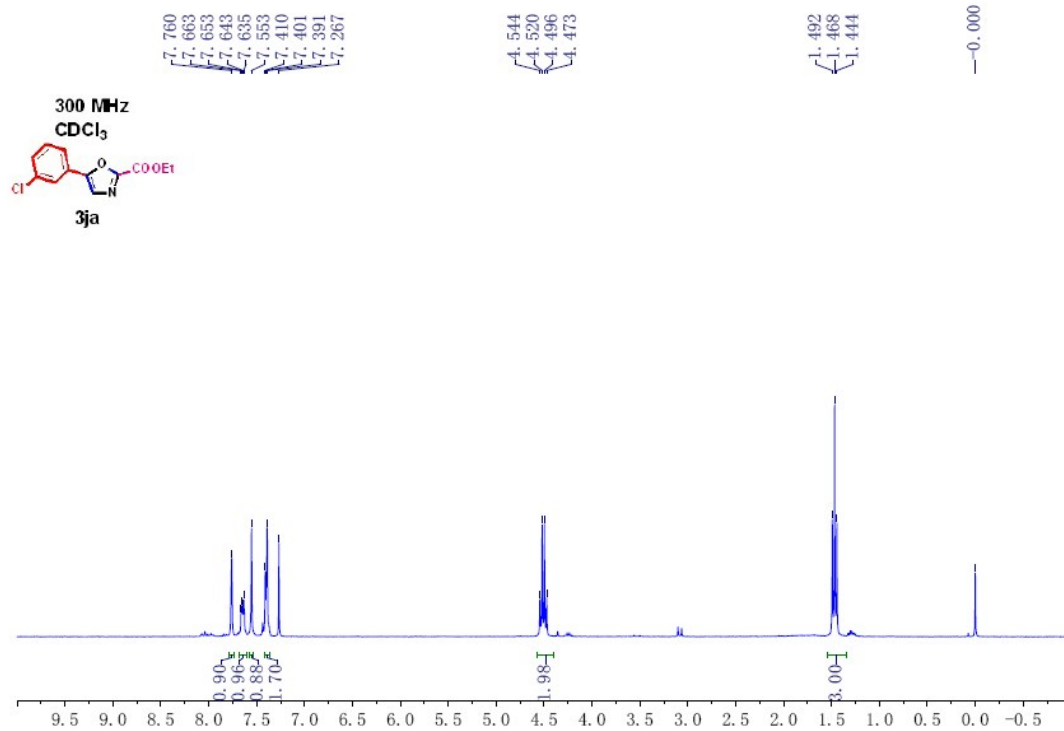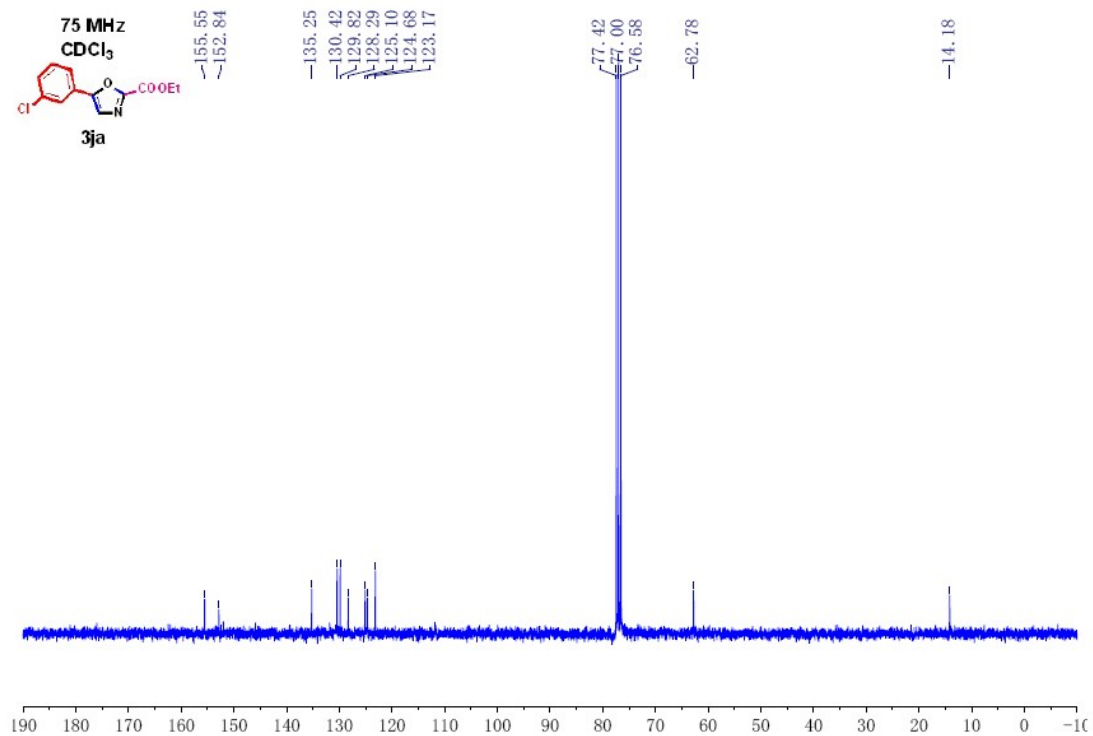

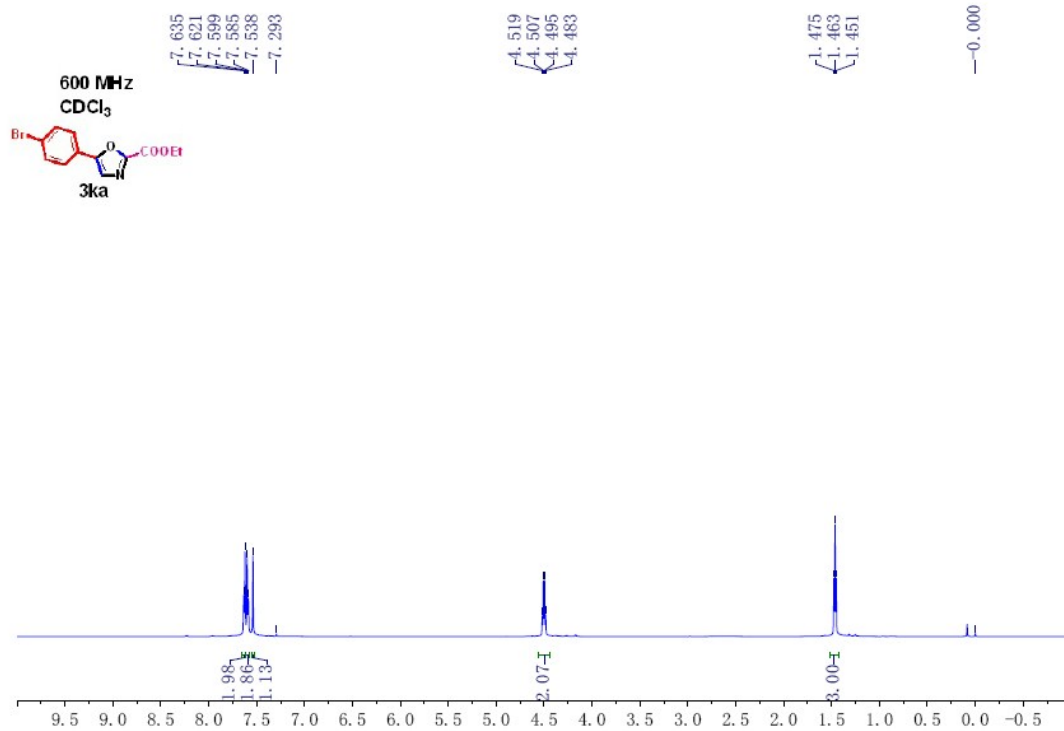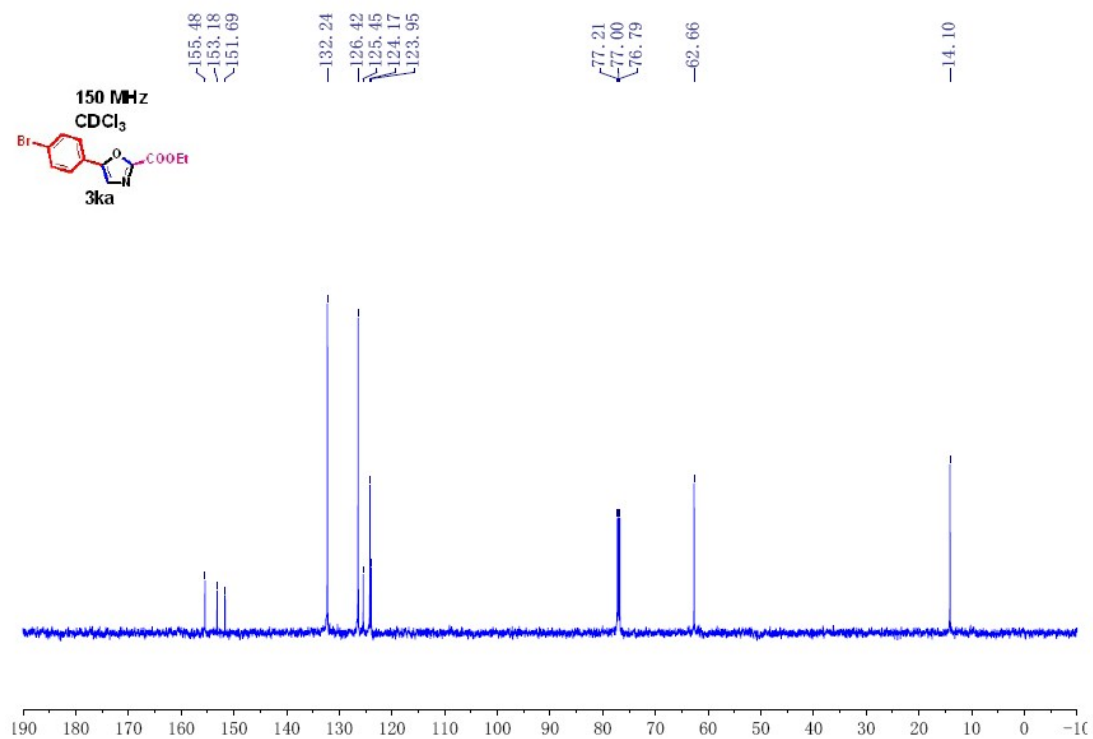



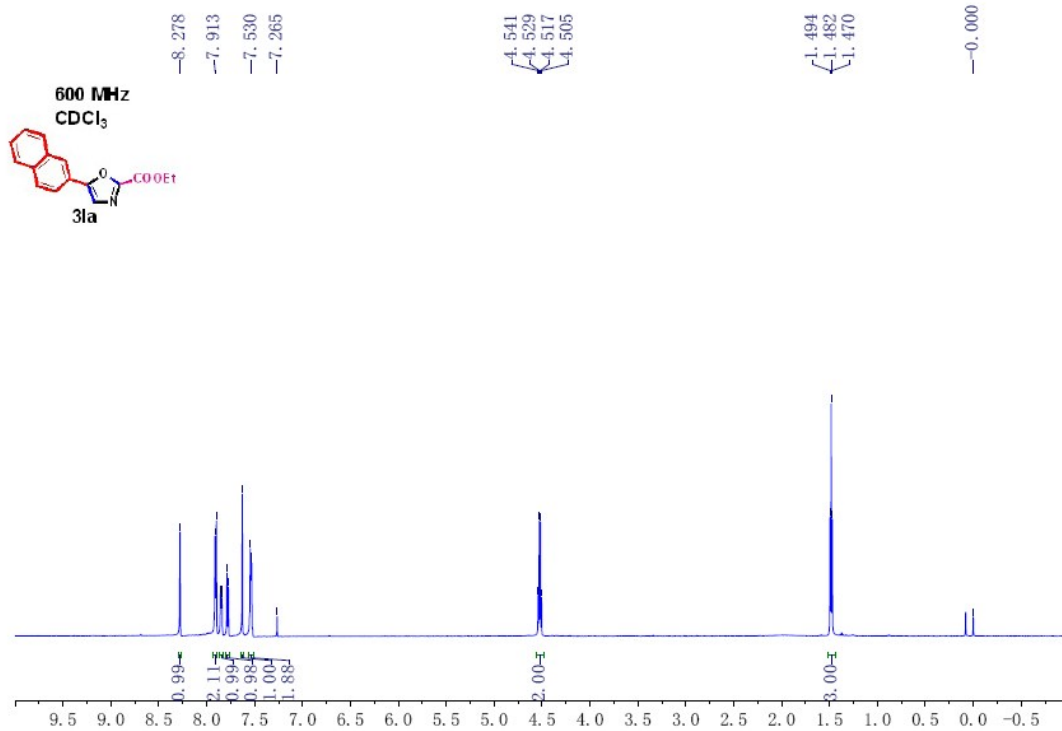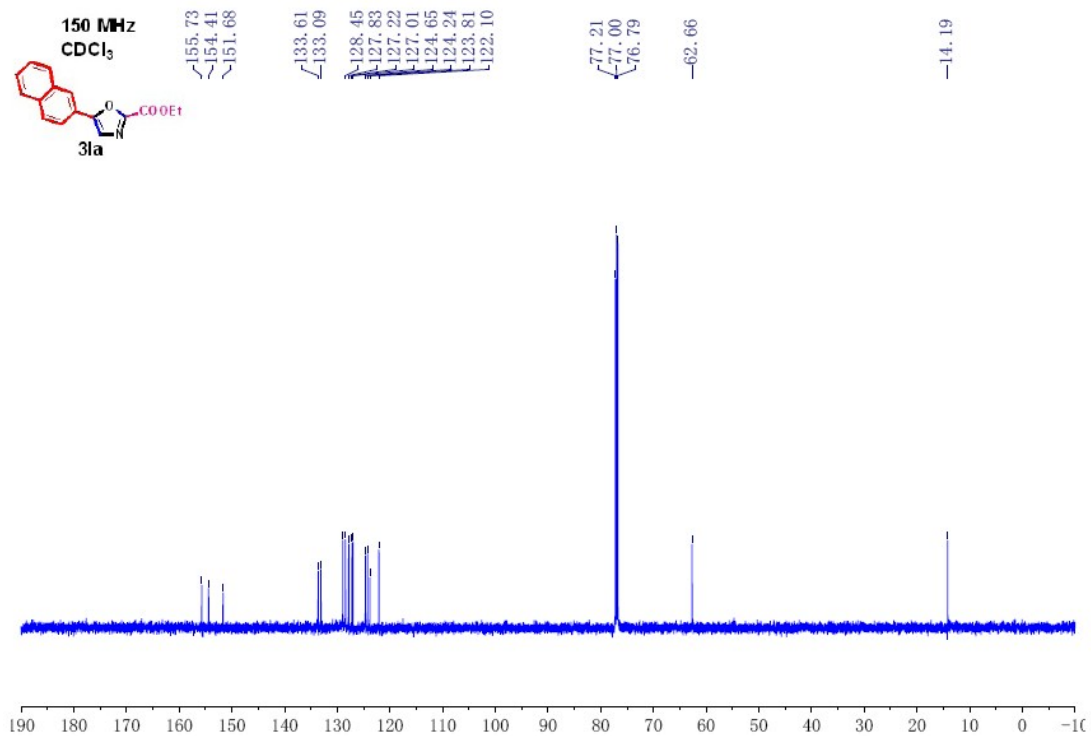

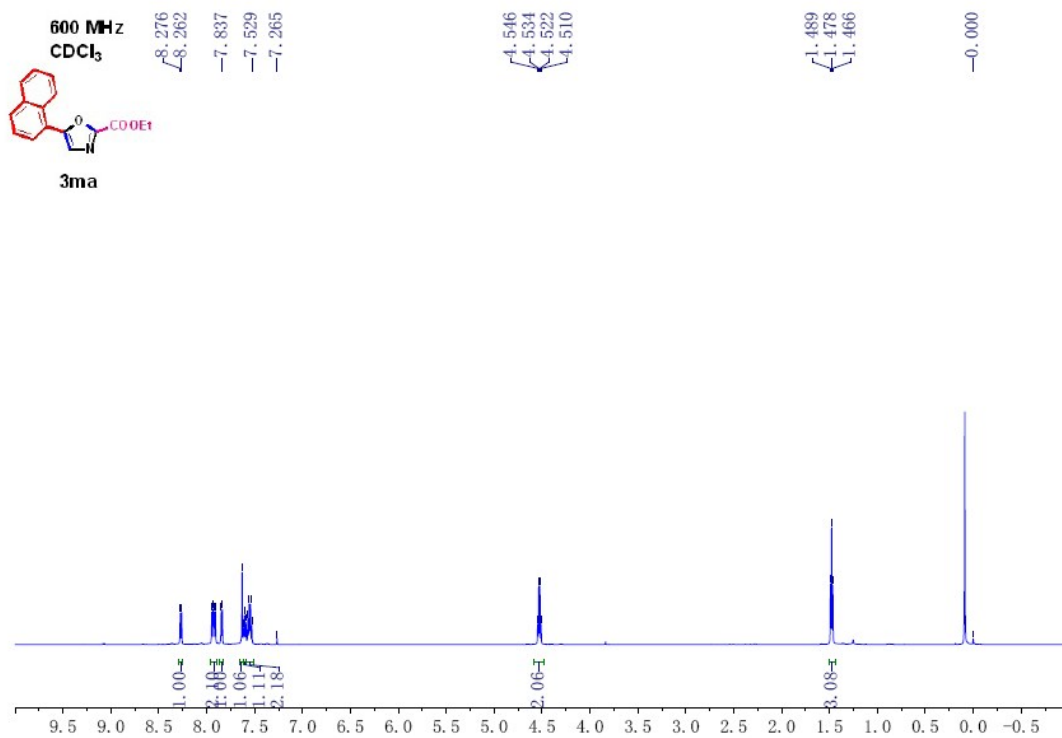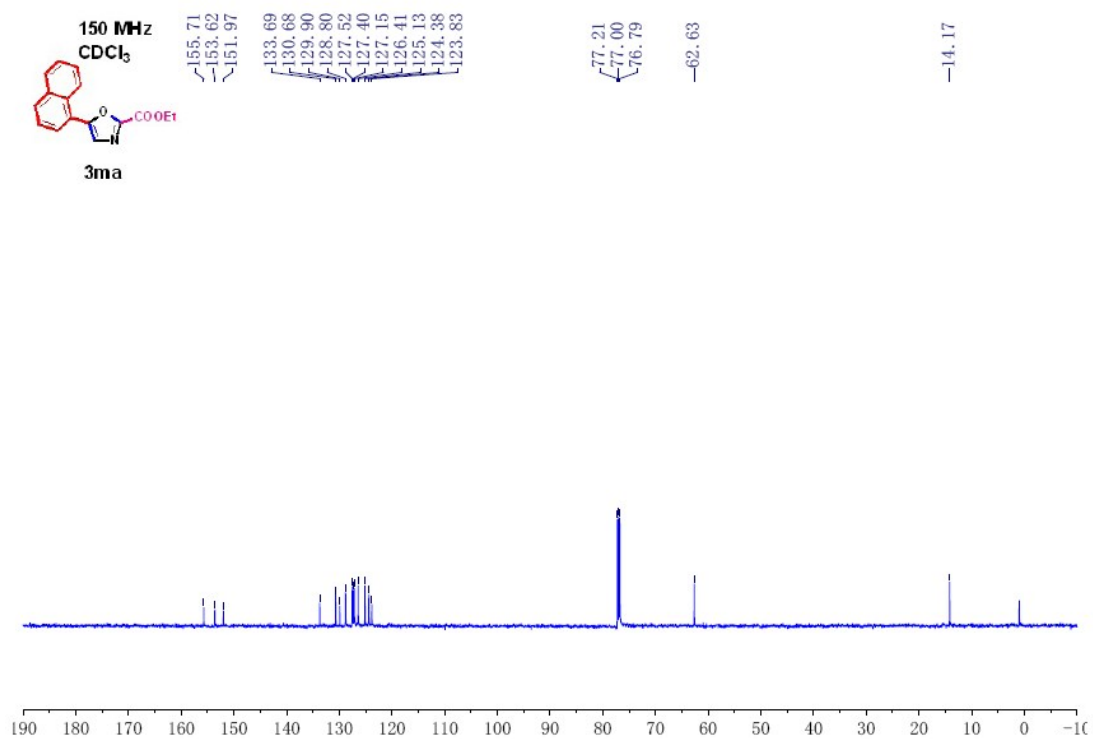

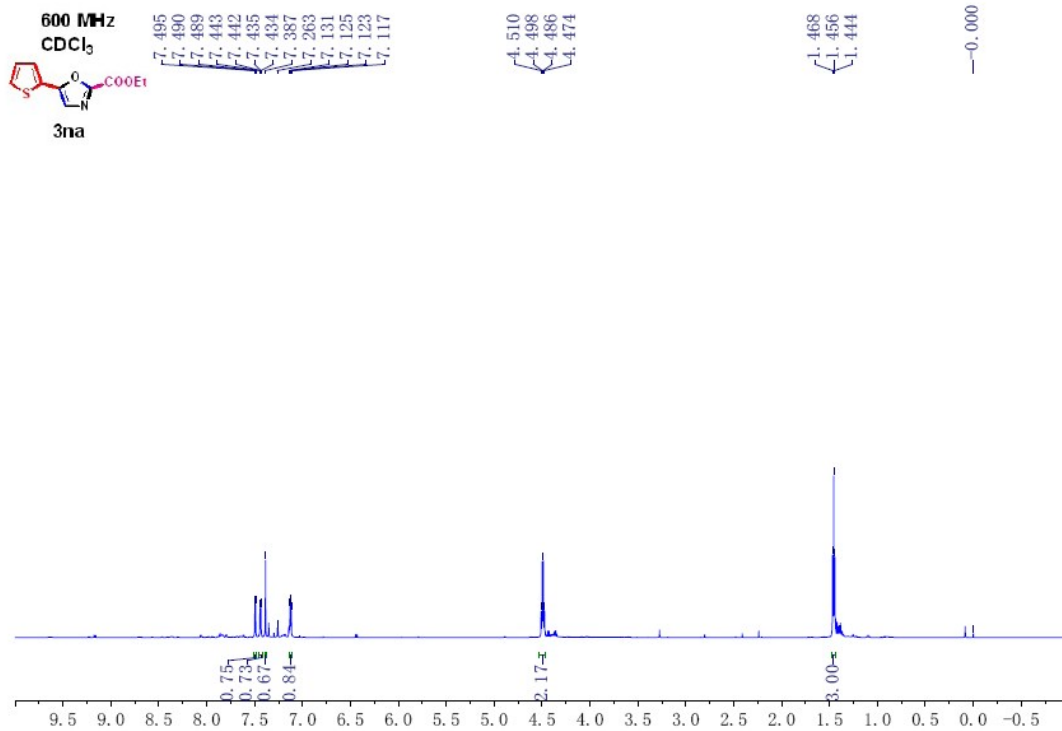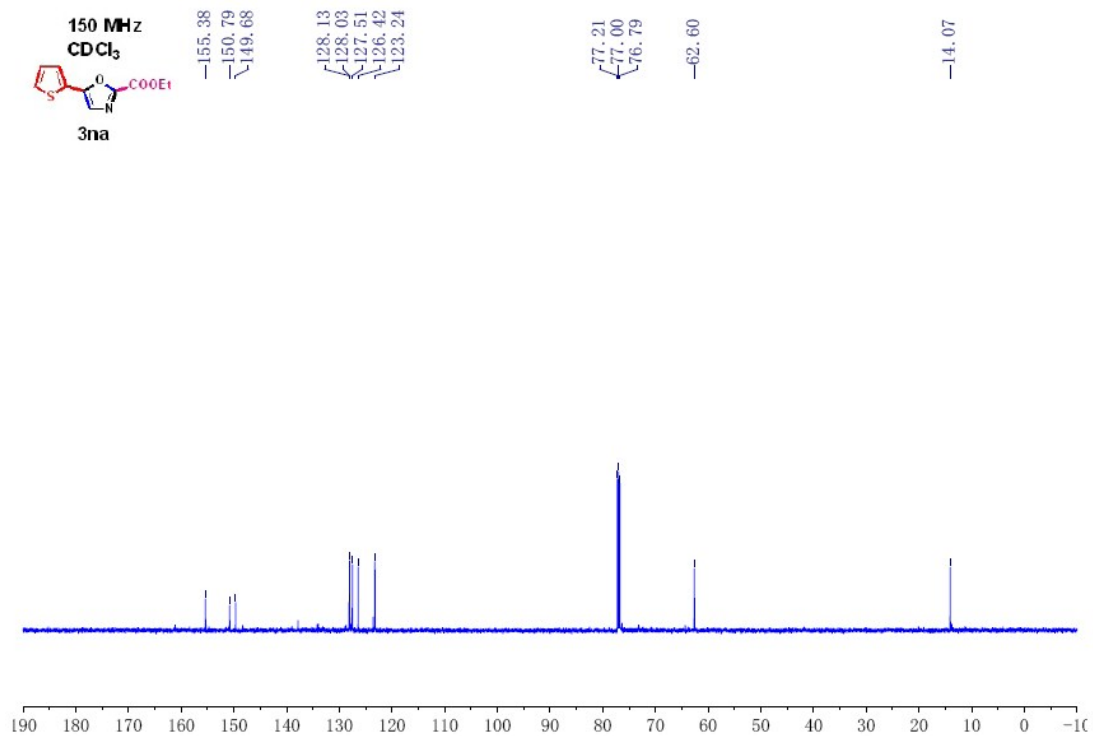

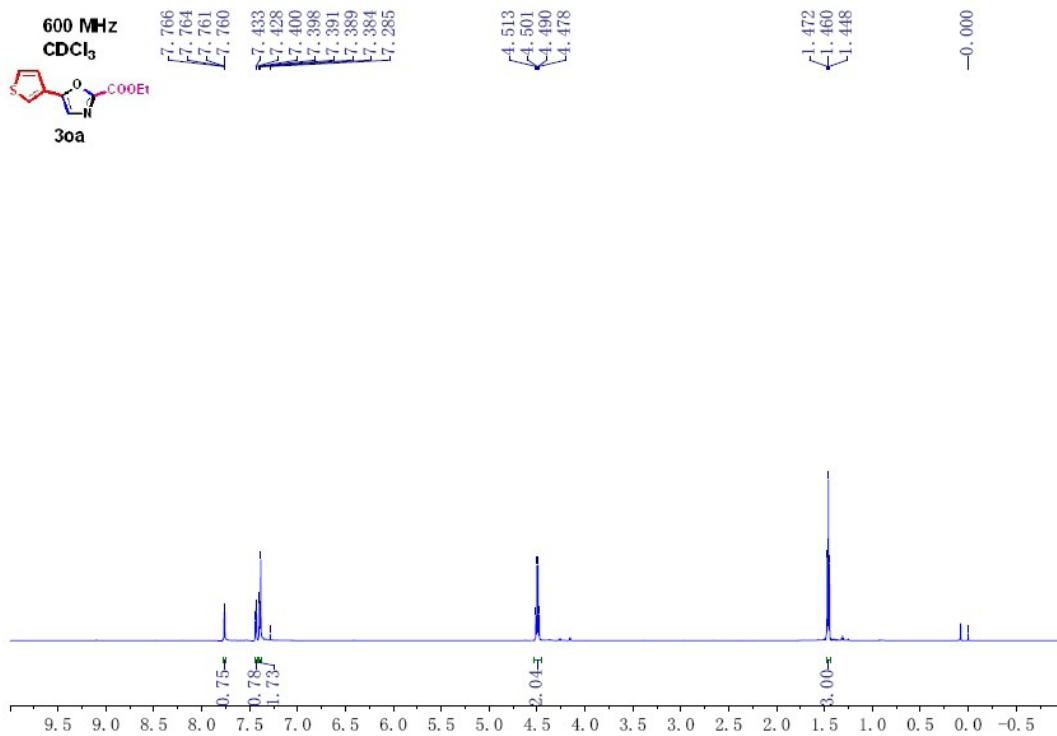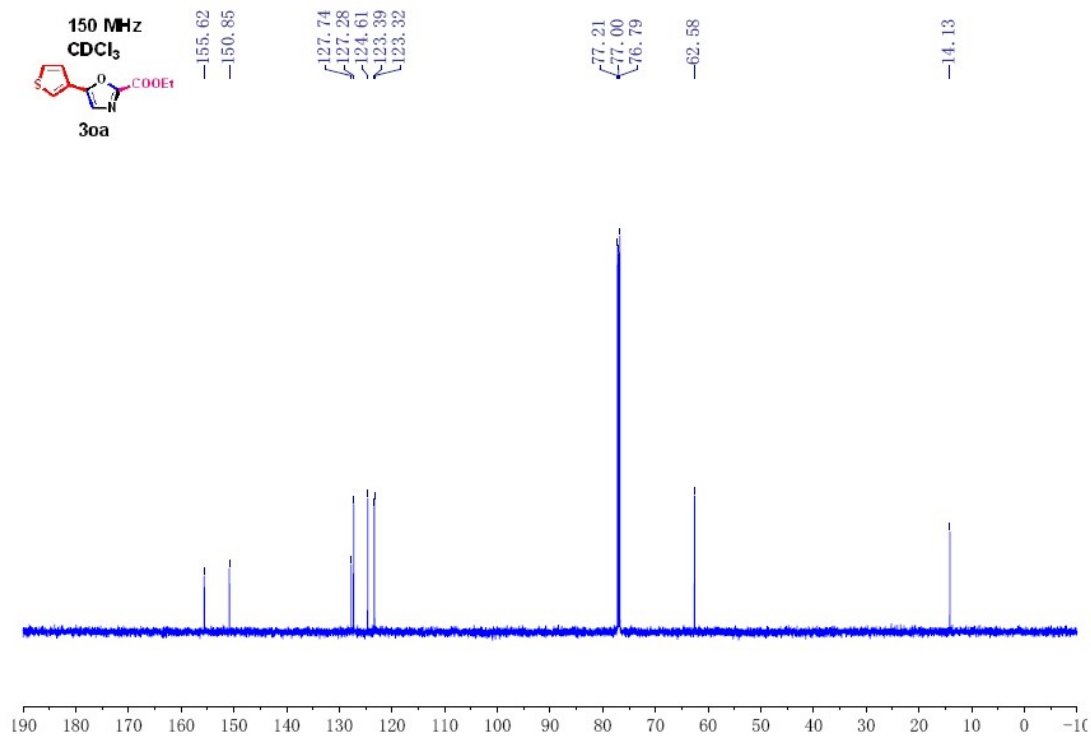

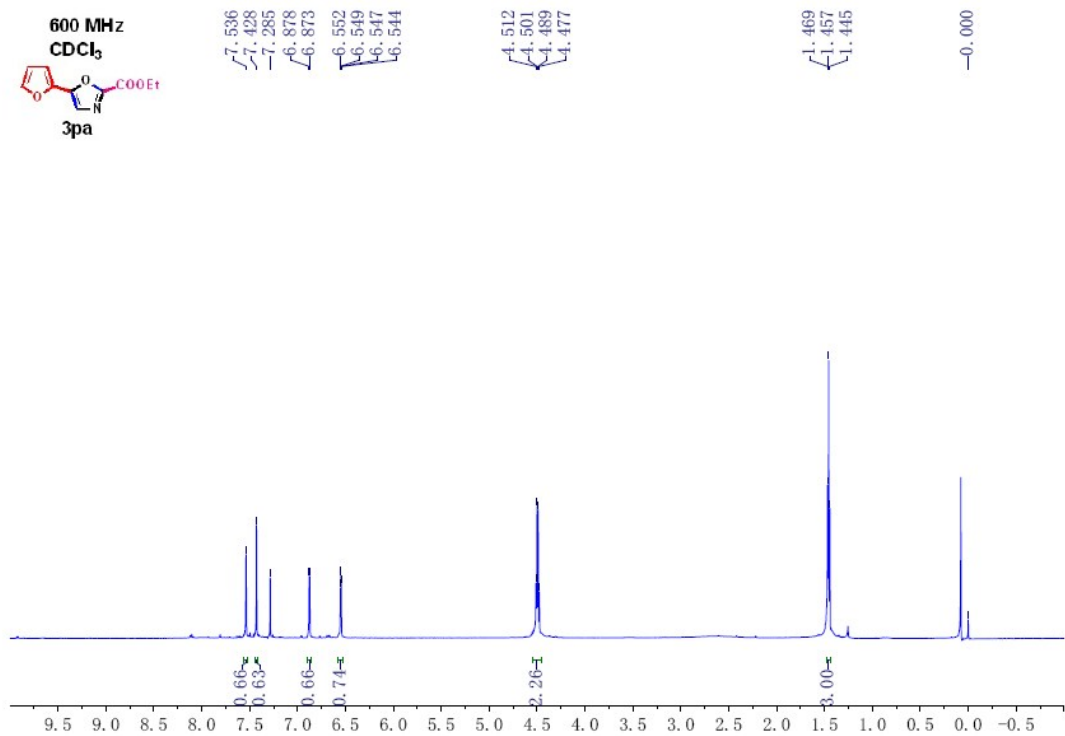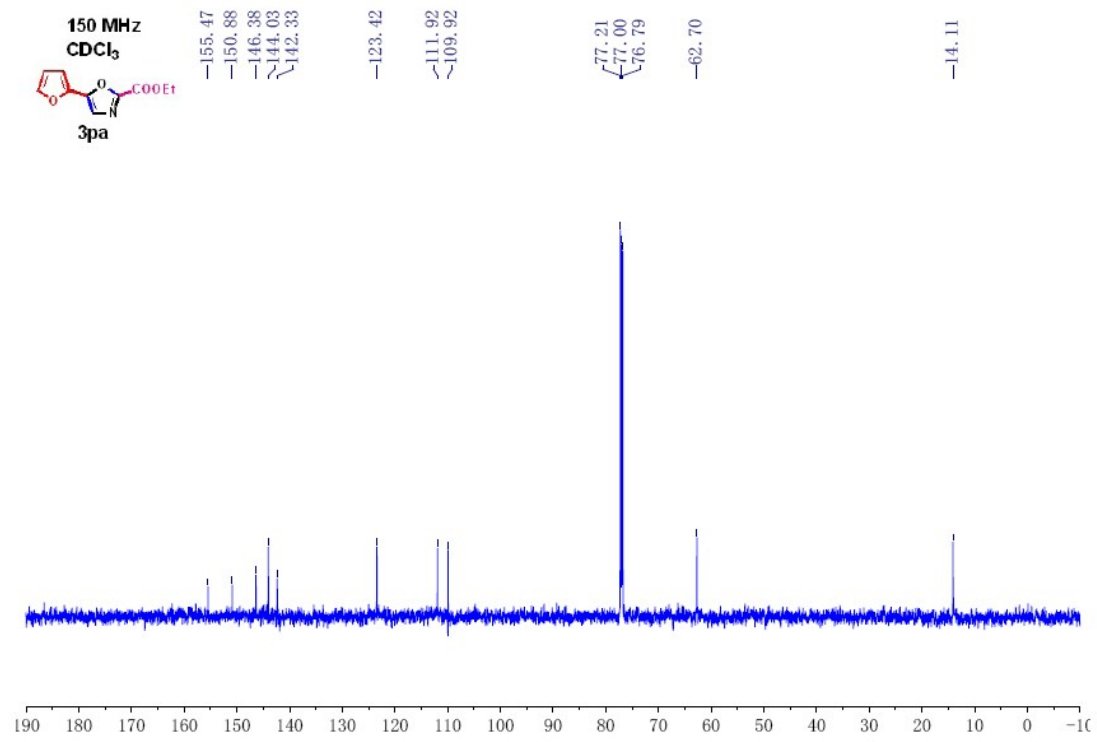

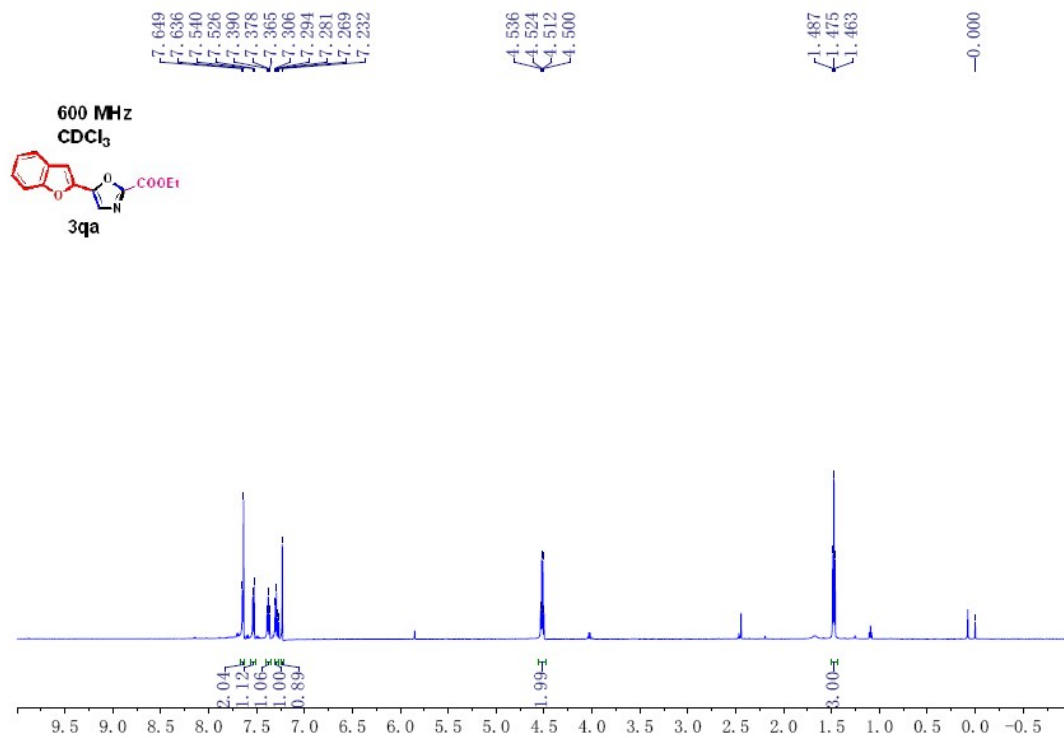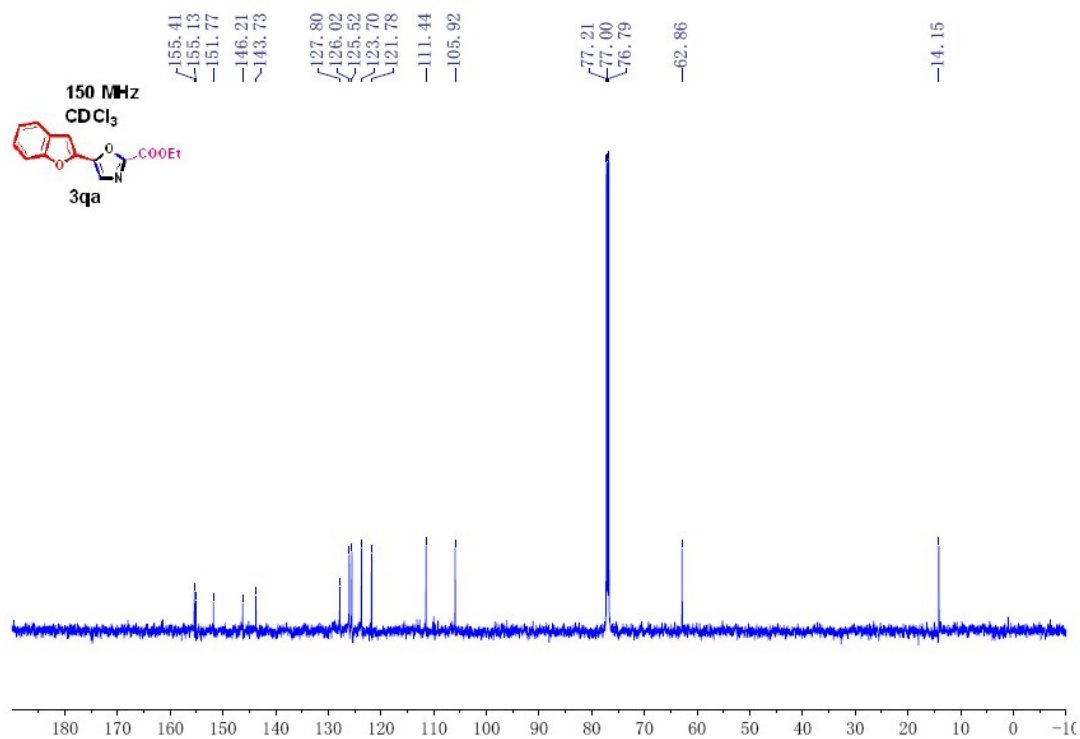

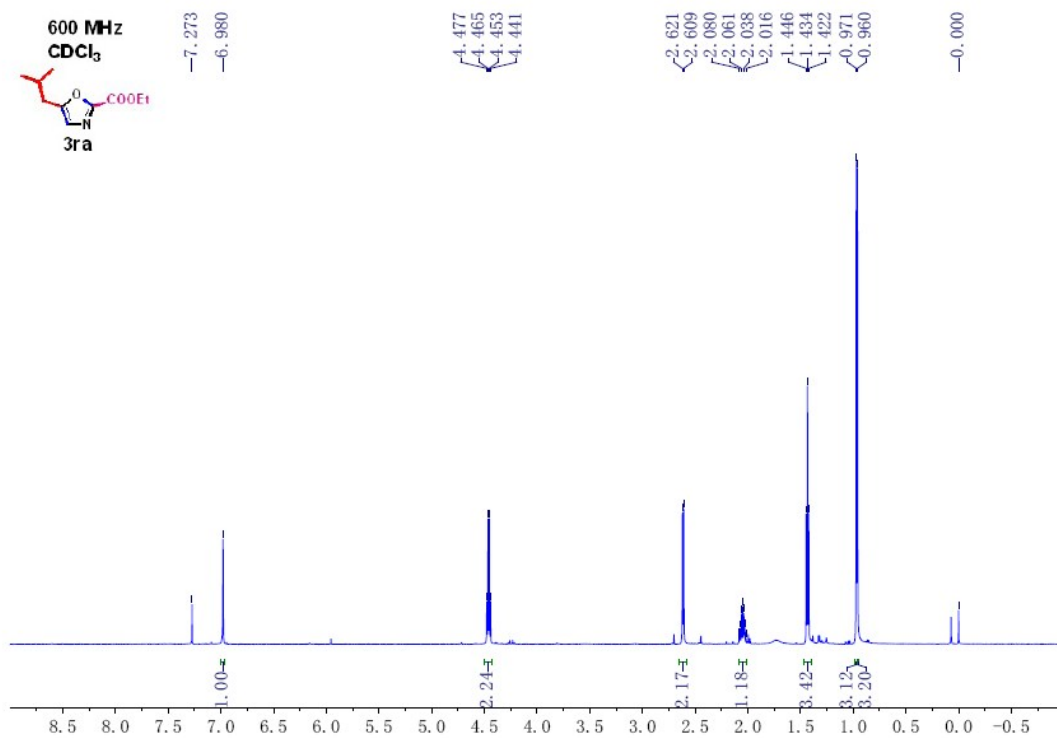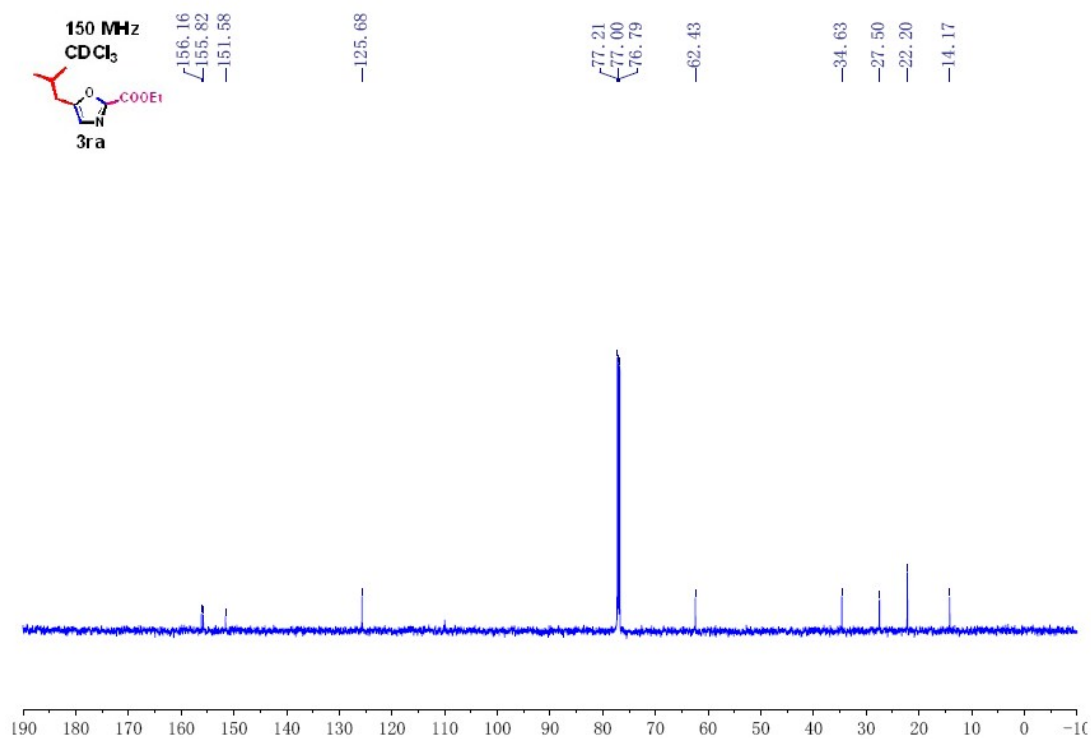

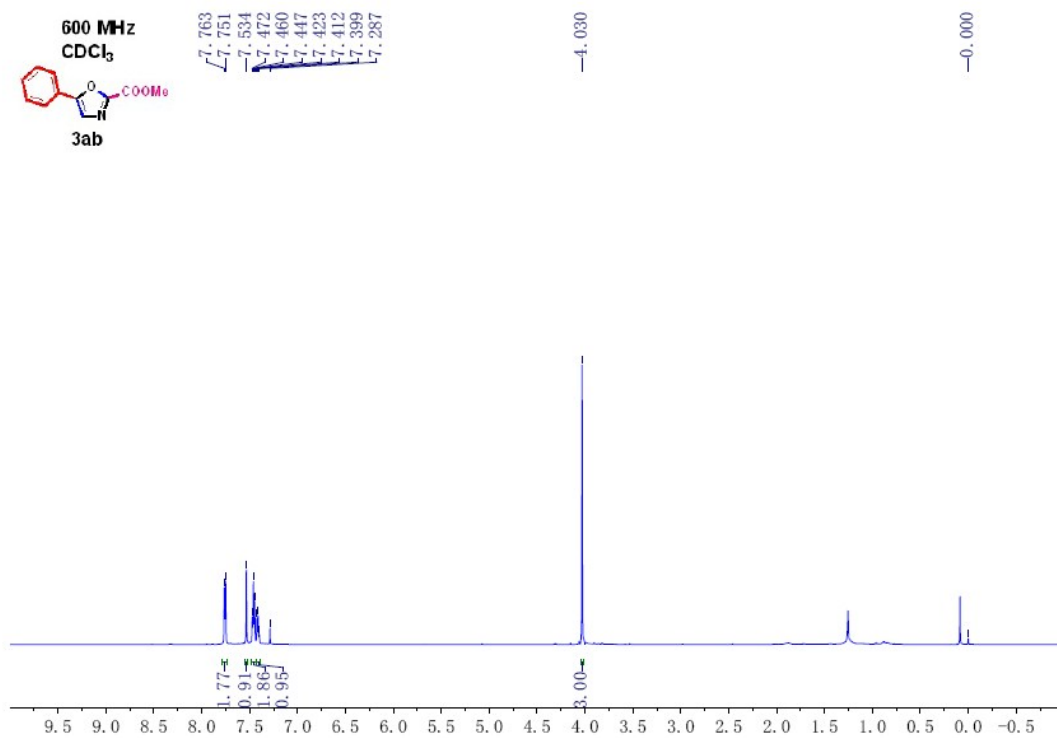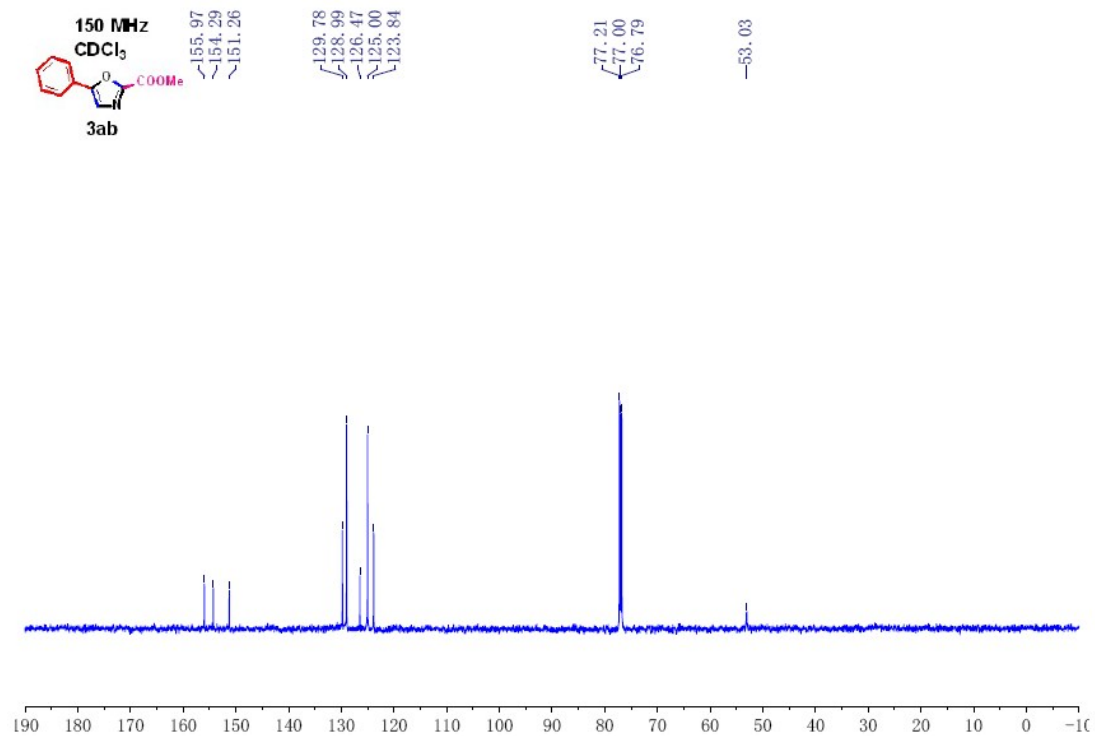



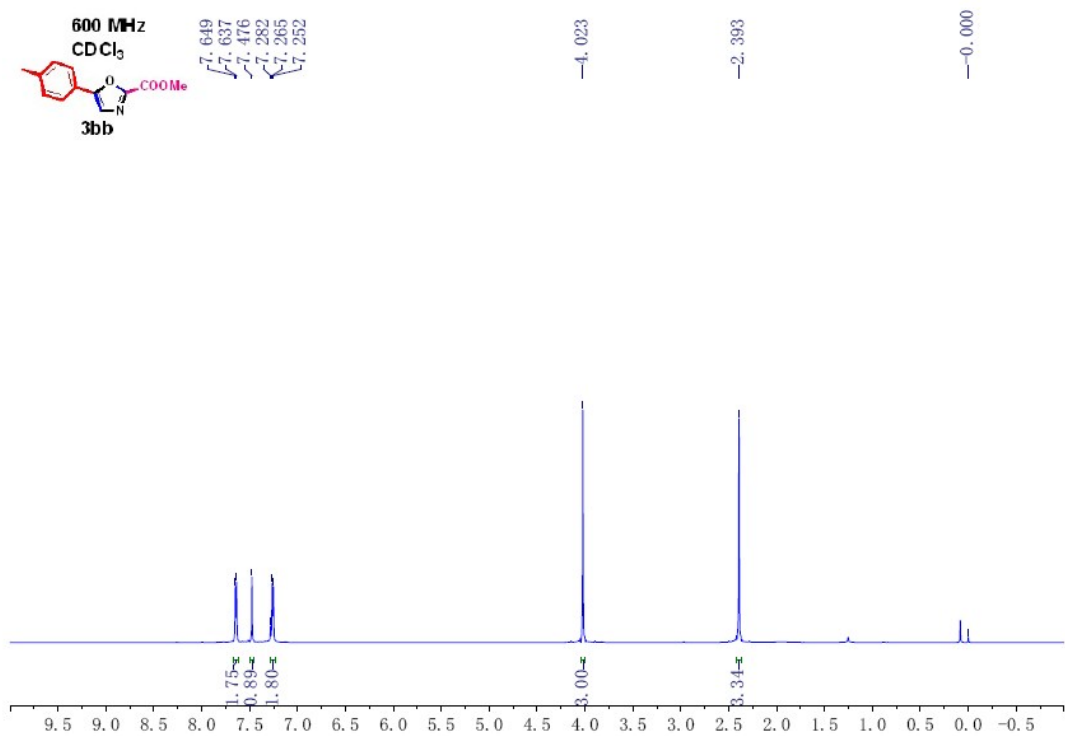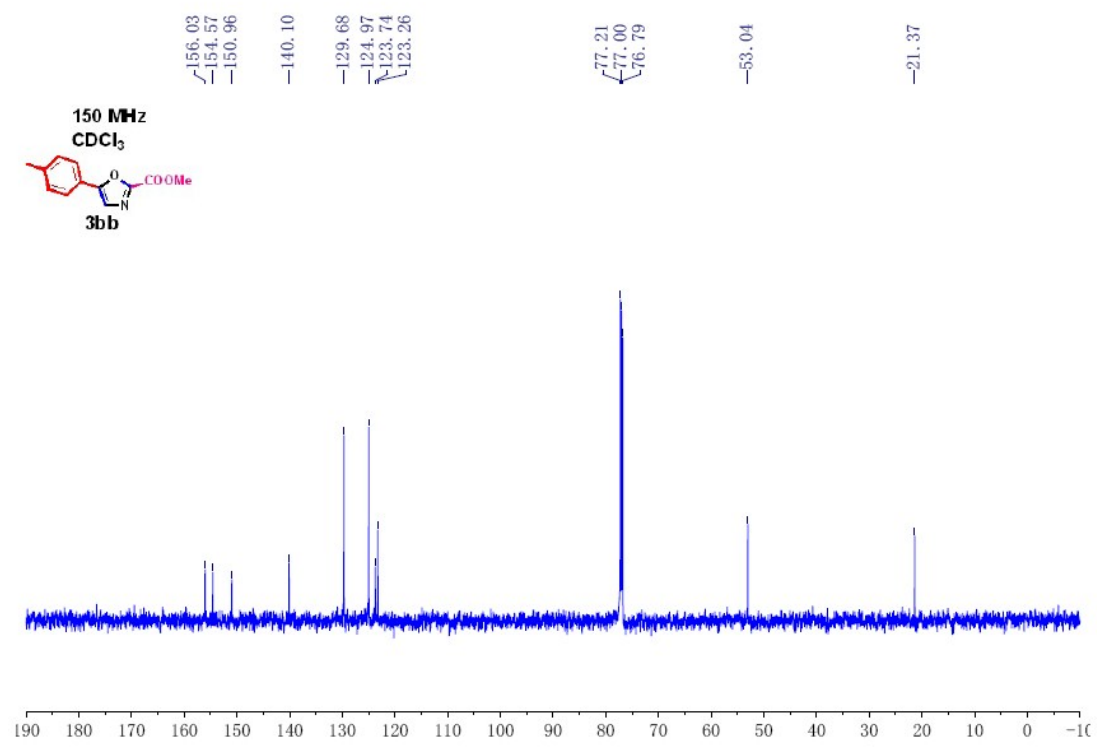

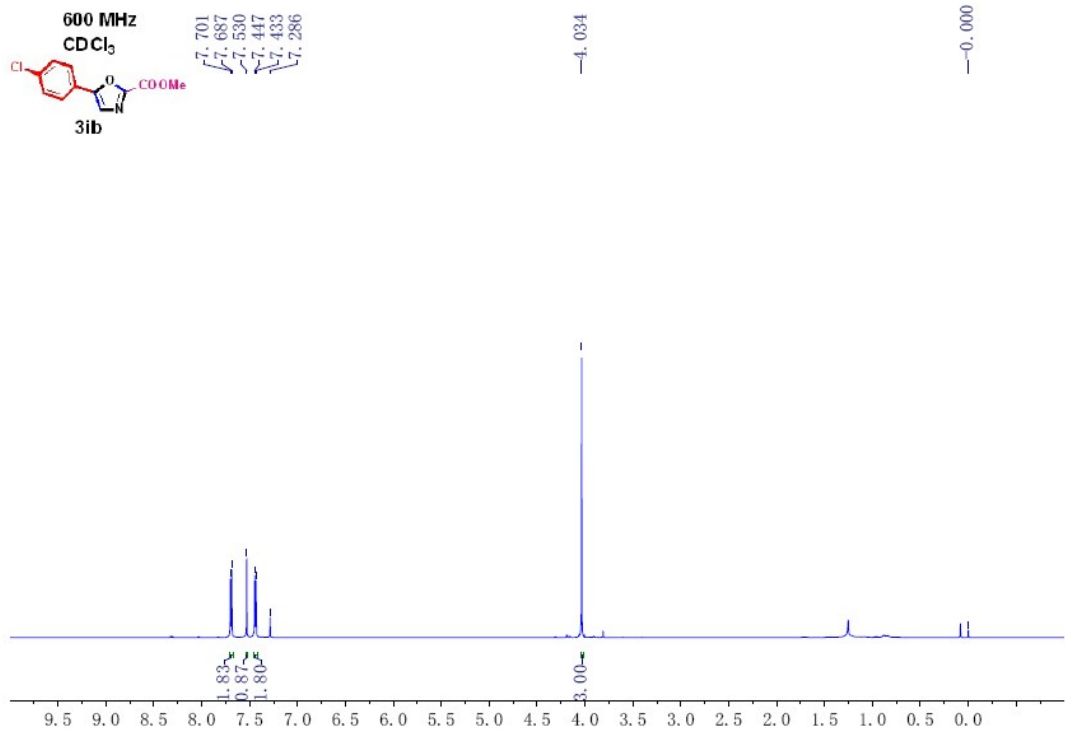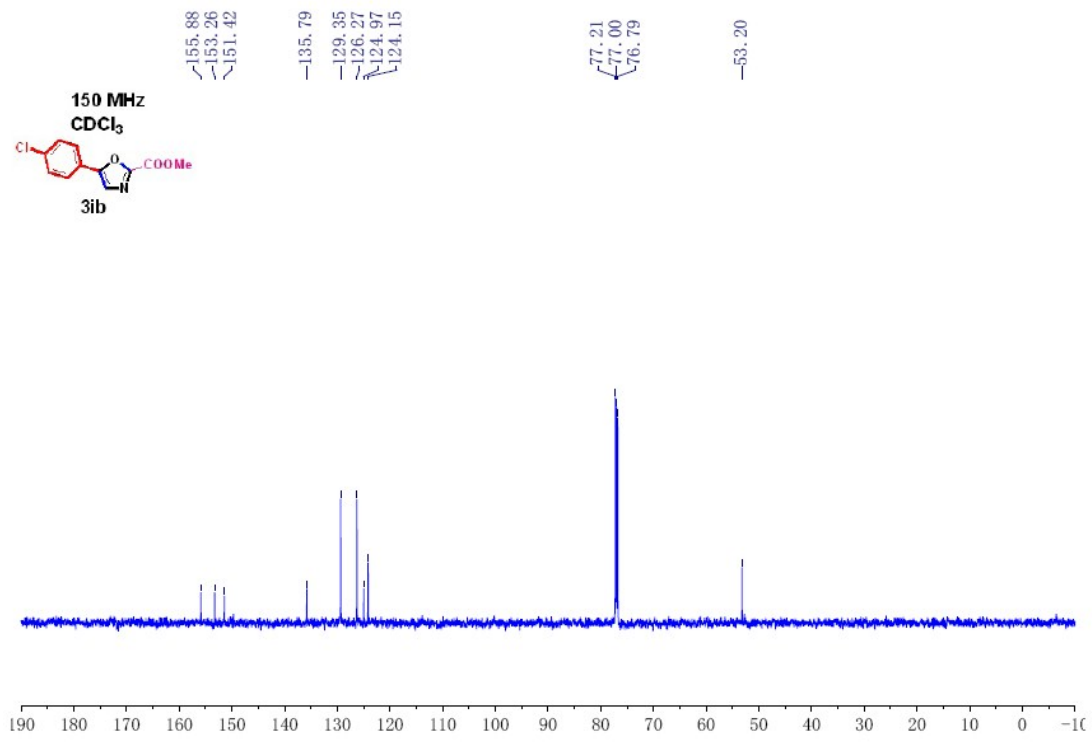

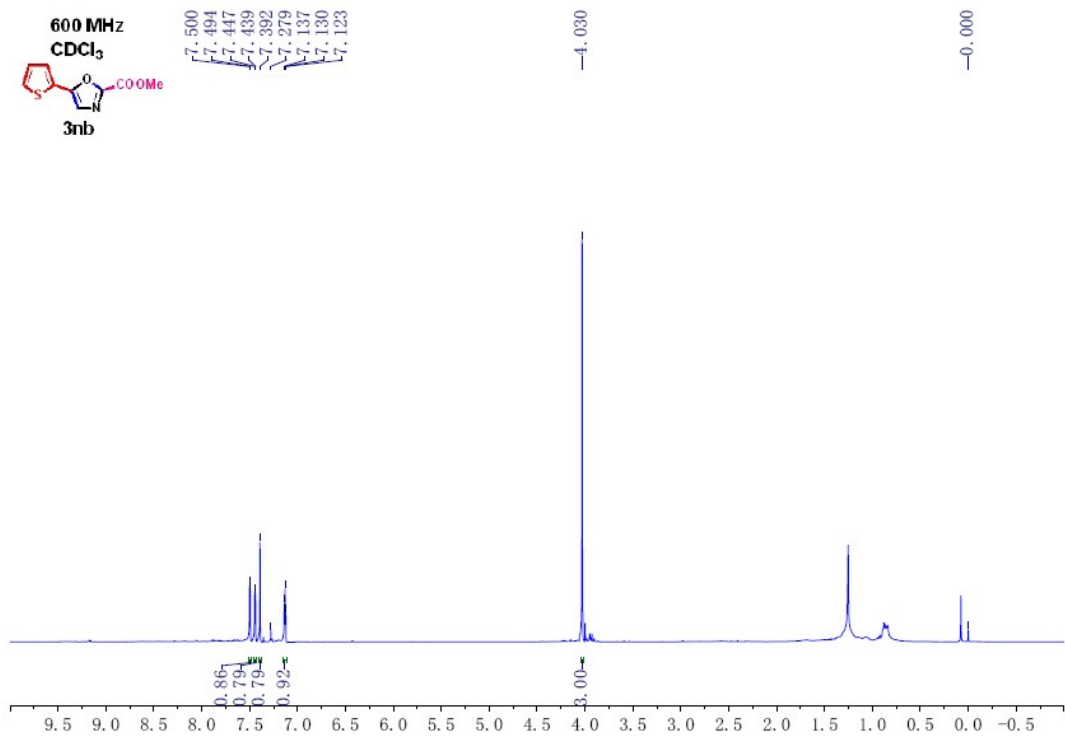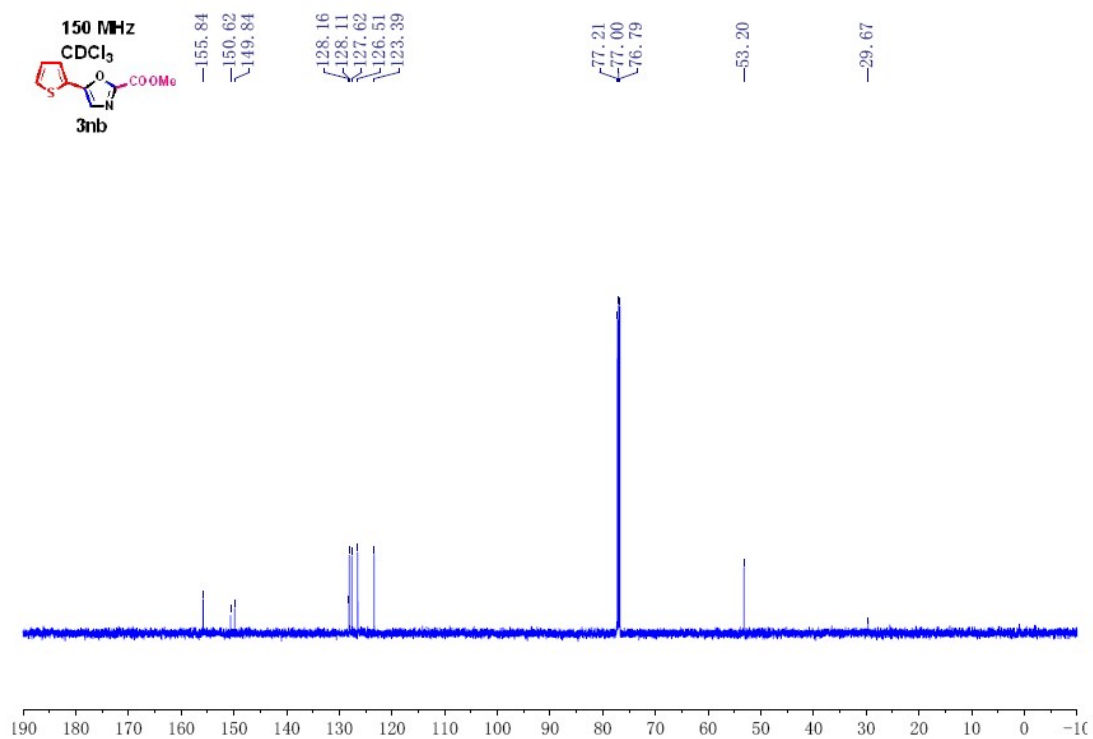

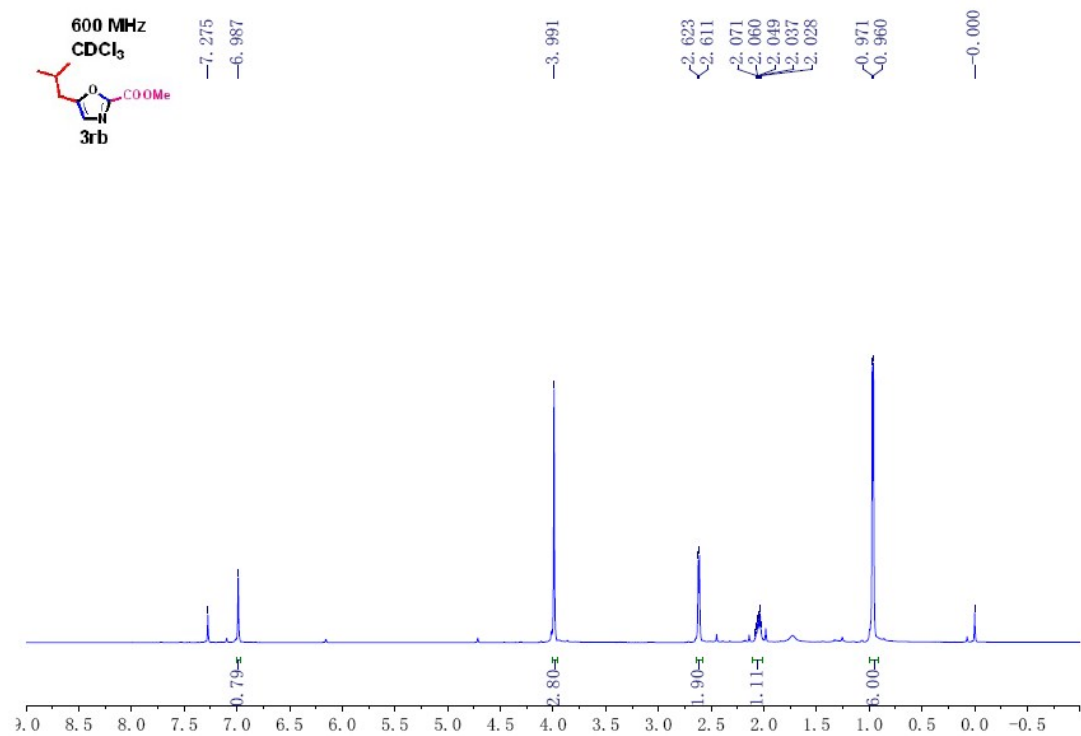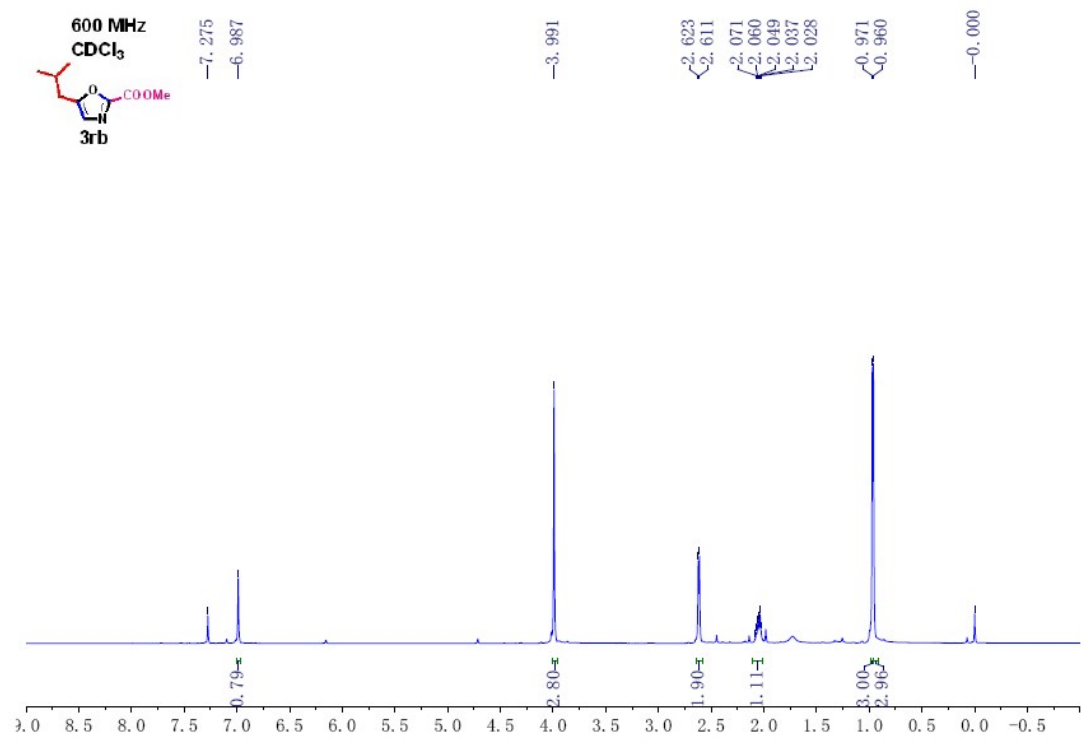

Supplement: c6cc10275a1.pdf [file c6cc10275a1.pdf]
